# Supplementary material for: Polymer-Bitumen Interaction: A Correlation Study with Six Different Bitumens to Investigate the Influence of SARA Fractions on the Phase Stability, Swelling, and Thermo-Rheological Properties of SBS-PmB
Source: Materials (Basel). 2021 Mar 8;14(5):1273. doi: 10.3390/ma14051273 (PMC7962451; doi:10.3390/ma14051273)
Supplement: Supplementary file 1 [file materials-14-01273-s001.xlsx]

## Sheet: Data Rheology
			BM199	20/30	A1													BM209	20/30	0.05	A1												BM200	30/45	A2	100												BM211	A2
		t in s	t_seg in s	T in °C	G' in Pa	G" in Pa	|ƒ*| in Pas	Ì in °	Â in -	M in µNm	G*		Delta	G*			t in s	t_seg in s	T in °C	G' in Pa	G" in Pa	|ƒ*| in Pas	Ì in °	Â in -	M in µNm	G*		Delta	G*				t in s	t_seg in s	T in °C	G' in Pa	G" in Pa	|ƒ*| in Pas	Ì in °	Â in -	M in µNm	G*		Delta	G*
	1|1	1244	30.44	-29.33	467800000	48540000	47010000	5.924	0.0005718	27030	4.70312e+08	8.67239				1|1	1244	30.55	-29.24	440600000	32000000	44160000	4.154	0.0005872	26080	4.41761e+08	8.64519					1|1	1243	30.43	-29.34	368100000	55820000	37220000	8.622	0.0006278	23500	3.72308e+08	8.5709					t in s	t_seg in s
	1|2	1274	59.92	-28.07	460200000	48420000	46260000	6.006	0.000576	26800	4.6274e+08	8.66534				1|2	1273	59.31	-28.08	431300000	31880000	43240000	4.227	0.0005925	25760	4.32477e+08	8.63596					1|2	1272	59.83	-28.06	358100000	54960000	36220000	8.726	0.0006349	23120	3.62293e+08	8.55906				1|1	1244	30.48
	1|3	1303	89.38	-27.1	455400000	48540000	45780000	6.084	0.0005788	26650	4.5798e+08	8.66085	0.171154	-0.00767655		1|3	1304	90.1	-27.09	426200000	31910000	42730000	4.282	0.0005957	25590	4.27393e+08	8.63083	0.133654	-0.00713271			1|3	1302	89.31	-27.11	351000000	54530000	35510000	8.83	0.0006395	22840	3.55211e+08	8.55049	0.243158	-0.0108822		1|2	1274	60.06
	1|4	1333	119.5	-26.11	449700000	48650000	45220000	6.175	0.0005823	26480	4.52324e+08	8.65545	-25	-25		1|4	1334	120.2	-26.06	420200000	32220000	42140000	4.385	0.0005994	25400	4.21433e+08	8.62473	-25	-25			1|4	1333	120.7	-26.06	343300000	54340000	34750000	8.993	0.0006449	22540	3.47574e+08	8.54105	-25	-25		1|3	1304	90.17
	1|5	1363	149.6	-25.09	441800000	49090000	44440000	6.341	0.0005869	26230	4.44519e+08	8.64789	0.0865385	0.0865385		1|5	1363	149.6	-25.1	414500000	32640000	41560000	4.503	0.000603	25200	4.15783e+08	8.61887	0.0961538	0.0961538			1|5	1363	150.1	-25.07	335100000	54240000	33930000	9.195	0.0006509	22210	3.39461e+08	8.53079	0.0736842	0.0736842		1|4	1335	120.8
	1|6	1395	181	-24.05	433600000	49550000	43630000	6.519	0.0005916	25960	4.36422e+08	8.63991	6.3564	8.6472		1|6	1394	180.3	-24.06	407400000	33090000	40870000	4.642	0.0006075	24970	4.08742e+08	8.61145	4.51637	8.61815			1|6	1392	179	-24.12	327000000	54290000	33140000	9.426	0.0006567	21880	3.31476e+08	8.52045	9.21202	8.53003		1|5	1364	150.3
	1|7	1425	211.1	-23.04	424700000	50050000	42750000	6.722	0.0005969	25660	4.27639e+08	8.63108		4.43812e+08		1|7	1423	209.2	-23.12	401000000	33590000	40220000	4.789	0.0006115	24740	4.02404e+08	8.60466		4.15101e+08			1|7	1422	209	-23.11	318300000	54350000	32280000	9.689	0.0006631	21530	3.22907e+08	8.50908		3.38866e+08		1|6	1393	179.1
	1|8	1454	240.5	-22.09	416200000	50640000	41910000	6.937	0.0006018	25370	4.19269e+08	8.62249				1|8	1454	240.5	-22.06	392900000	34250000	39430000	4.983	0.0006168	24450	3.9439e+08	8.59593					1|8	1453	240.4	-22.07	308700000	54460000	31340000	10	0.0006702	21120	3.13467e+08	8.49619				1|7	1423	209.1
	1|9	1485	271.2	-21.05	405300000	51200000	40840000	7.199	0.0006086	25000	4.08521e+08	8.61121				1|9	1483	269.4	-21.11	385100000	34820000	38650000	5.167	0.0006219	24170	3.86671e+08	8.58734					1|9	1483	269.9	-21.11	299800000	54530000	30470000	10.31	0.0006768	20740	3.04719e+08	8.4839				1|8	1453	239.2
	1|10	1514	300.1	-20.09	395800000	51770000	39910000	7.452	0.0006146	24670	3.99171e+08	8.60116				1|10	1514	300.1	-20.1	376500000	35470000	37800000	5.382	0.0006276	23860	3.78167e+08	8.57768					1|10	1513	300	-20.08	289900000	54630000	29490000	10.67	0.0006846	20300	2.95002e+08	8.46983				1|9	1484	270
	1|11	1545	330.8	-19.06	384100000	52360000	38750000	7.763	0.000622	24240	3.87652e+08	8.58844				1|11	1543	329.6	-19.11	367900000	36170000	36960000	5.615	0.0006332	23530	3.69674e+08	8.56782					1|11	1543	330.1	-19.07	280500000	54720000	28570000	11.04	0.000692	19880	2.85788e+08	8.45604				1|10	1515	300.8
	1|12	1573	359	-18.14	374400000	52930000	37800000	8.047	0.0006282	23880	3.78123e+08	8.57763				1|12	1574	360.3	-18.07	358500000	36910000	36030000	5.879	0.0006396	23170	3.60395e+08	8.55678					1|12	1572	358.9	-18.13	270700000	54720000	27610000	11.43	0.0006999	19430	2.76175e+08	8.44118				1|11	1544	330.2
	1|13	1603	389.8	-17.11	362800000	53500000	36660000	8.389	0.0006358	23440	3.66723e+08	8.56434	0.410377	-0.0155938		1|13	1605	391	-17.05	348900000	37550000	35080000	6.142	0.0006464	22810	3.50915e+08	8.5452	0.314141	-0.0129302			1|13	1602	389.6	-17.1	260900000	54730000	26660000	11.85	0.0007078	18970	2.66579e+08	8.42583	0.480769	-0.0173905		1|12	1574	359.6
	1|14	1634	419.8	-16.11	350900000	54010000	35490000	8.751	0.000644	22990	3.55032e+08	8.55027	-15	-15		1|14	1634	420.5	-16.08	339600000	38260000	34160000	6.429	0.0006529	22430	3.41748e+08	8.53371	-15	-15			1|14	1634	421	-16.04	250600000	54690000	25640000	12.31	0.0007163	18470	2.56498e+08	8.40908	-15	-15		1|13	1604	390.4
	1|15	1663	449.3	-15.13	339800000	54510000	34400000	9.115	0.0006514	22530	3.44144e+08	8.53674	0.122642	0.122642		1|15	1664	450	-15.09	330200000	38990000	33240000	6.734	0.0006595	22040	3.32494e+08	8.52178	0.0909091	0.0909091			1|15	1662	449.2	-15.09	241000000	54530000	24700000	12.75	0.0007246	18000	2.47092e+08	8.39286	0.0865385	0.0865385		1|14	1633	419.2
	1|16	1694	480.6	-14.07	326700000	54970000	33120000	9.55	0.0006608	22010	3.31292e+08	8.52021	9.16835	8.53471		1|16	1693	479.5	-14.1	320400000	39590000	32270000	7.045	0.0006667	21630	3.22837e+08	8.50898	6.76227	8.52062			1|16	1693	480.6	-14.05	230700000	54340000	23700000	13.25	0.000734	17490	2.37013e+08	8.37477	12.7933	8.39129		1|15	1663	449.3
	1|17	1725	510.8	-13.08	315100000	55390000	31990000	9.969	0.0006691	21520	3.19931e+08	8.50506		3.42542e+08		1|17	1723	508.9	-13.14	311000000	40250000	31350000	7.376	0.0006737	21240	3.13594e+08	8.49637		3.31604e+08			1|17	1723	510.7	-13.07	222000000	54130000	22840000	13.7	0.0007417	17040	2.28504e+08	8.35889		2.46203e+08		1|16	1693	479.4
	1|18	1754	540.2	-12.09	303500000	55710000	30850000	10.4	0.0006779	21030	3.08571e+08	8.48935				1|18	1754	539.7	-12.11	301000000	40960000	30370000	7.75	0.0006813	20810	3.03774e+08	8.48255					1|18	1753	540.2	-12.1	212600000	53830000	21920000	14.21	0.00075	16530	2.19309e+08	8.34106				1|17	1723	509.5
	1|19	1784	570.3	-11.09	291900000	55980000	29710000	10.86	0.0006869	20520	2.97219e+08	8.47308				1|19	1783	569.1	-11.13	291000000	41600000	29390000	8.136	0.000689	20360	2.93958e+08	8.46829					1|19	1782	569.6	-11.09	202600000	53370000	20950000	14.76	0.0007603	16020	2.09512e+08	8.32121				1|18	1755	540.9
	1|20	1814	599.8	-10.11	280500000	56160000	28600000	11.32	0.0006955	20000	2.86067e+08	8.45647				1|20	1814	600.5	-10.08	280900000	42190000	28400000	8.542	0.0006972	19910	2.84051e+08	8.4534					1|20	1812	599.1	-10.13	194000000	52960000	20110000	15.27	0.0007679	15530	2.01099e+08	8.30341				1|19	1784	570.3
	1|21	1844	630.5	-9.118	269200000	56250000	27500000	11.8	0.000705	19490	2.75014e+08	8.43935				1|21	1844	630.6	-9.096	271400000	42650000	27470000	8.931	0.0007051	19480	2.74731e+08	8.43891					1|21	1842	629.2	-9.118	184800000	52380000	19210000	15.82	0.000777	15010	1.9208e+08	8.28348				1|20	1814	599.8
	1|22	1874	660.6	-8.087	257400000	56210000	26340000	12.32	0.0007145	18930	2.63466e+08	8.42072				1|22	1874	660	-8.126	261900000	43170000	26540000	9.358	0.0007129	19030	2.65434e+08	8.42396					1|22	1873	660.6	-8.091	175900000	51800000	18330000	16.41	0.0007864	14500	1.83369e+08	8.26333				1|21	1844	630.5
	1|23	1904	690.7	-7.084	246200000	56180000	25250000	12.85	0.0007243	18390	2.52528e+08	8.40231	0.578999	-0.0200212		1|23	1904	690.1	-7.106	252300000	43630000	25600000	9.812	0.0007207	18550	2.56045e+08	8.40832	0.491159	-0.0181536			1|23	1903	690.6	-7.091	167400000	51120000	17500000	16.98	0.0007951	13990	1.75031e+08	8.24312	0.664137	-0.0236197		1|22	1875	660.6
	1|24	1935	720.8	-6.102	236000000	56160000	24250000	13.38	0.0007326	17870	2.4259e+08	8.38487	-5	-5		1|24	1933	719.5	-6.126	242800000	43900000	24670000	10.25	0.0007294	18090	2.46737e+08	8.39223	-5	-5			1|24	1933	720.7	-6.073	158600000	50340000	16640000	17.61	0.0008042	13450	1.66397e+08	8.22115	-5	-5		1|23	1905	690.7
	1|25	1963	749	-5.141	225500000	55940000	23230000	13.93	0.000742	17330	2.32335e+08	8.36611	0.138371	0.138371		1|25	1963	749	-5.153	233400000	44090000	23750000	10.7	0.0007378	17620	2.37528e+08	8.37571	0.150295	0.150295			1|25	1962	749.7	-5.136	151000000	49590000	15890000	18.18	0.0008129	12990	1.58934e+08	8.20122	0.129032	0.129032		1|24	1934	719.6
	1|26	1993	779.7	-4.122	214600000	55550000	22160000	14.52	0.0007523	16760	2.21673e+08	8.34571	14.0116	8.36329		1|26	1993	779.1	-4.135	223300000	44200000	22750000	11.2	0.0007469	17090	2.27632e+08	8.35723	10.7751	8.37294			1|26	1993	780.3	-4.082	142000000	48580000	15010000	18.88	0.0008227	12420	1.5008e+08	8.17632	18.2703	8.19801		1|25	1963	749
	1|27	2023	809.2	-3.135	204700000	55160000	21200000	15.08	0.0007608	16220	2.12002e+08	8.32634		2.3083e+08		1|27	2024	809.9	-3.099	213600000	44400000	21810000	11.74	0.0007558	16580	2.18166e+08	8.33879		2.36014e+08			1|27	2023	810.4	-3.101	134300000	47620000	14240000	19.53	0.0008319	11920	1.42493e+08	8.15379		1.57763e+08		1|26	1993	779.1
	1|28	2053	839.3	-2.144	194700000	54650000	20210000	15.68	0.0007718	15690	2.02224e+08	8.30583				1|28	2055	841.2	-2.063	204200000	44330000	20890000	12.25	0.0007651	16070	2.08956e+08	8.32006					1|28	2053	840.5	-2.096	126600000	46600000	13480000	20.21	0.0008409	11400	1.34904e+08	8.13003				1|27	2024	809.8
	1|29	2083	869.4	-1.138	184100000	54040000	19180000	16.36	0.0007822	15090	1.91867e+08	8.283				1|29	2085	870.7	-1.103	195500000	44320000	20040000	12.77	0.0007739	15600	2.00461e+08	8.30203					1|29	2083	870.1	-1.101	118800000	45420000	12720000	20.92	0.000851	10880	1.27187e+08	8.10444				1|28	2054	839.9
	1|30	2113	899.4	-0.1309	173900000	53360000	18190000	17.06	0.0007921	14490	1.81902e+08	8.25984				1|30	2113	899.5	-0.1124	186100000	44110000	19120000	13.33	0.0007833	15060	1.91256e+08	8.28162					1|30	2112	899.4	-0.1321	111800000	44320000	12030000	21.62	0.0008603	10410	1.20264e+08	8.08014				1|29	2084	870
	1|31	2143	929.5	0.8765	164200000	52610000	17230000	17.77	0.0008025	13910	1.72422e+08	8.23659				1|31	2143	929.6	0.8839	177700000	43940000	18300000	13.89	0.0007914	14560	1.83052e+08	8.26257					1|31	2143	930.2	0.8824	104700000	43100000	11320000	22.38	0.0008685	9883	1.13224e+08	8.05394				1|30	2113	899.5
	1|32	2173	959	1.857	154300000	51680000	16270000	18.51	0.0008128	13300	1.62725e+08	8.21145				1|32	2174	959.7	1.873	169000000	43620000	17450000	14.47	0.000801	14050	1.74539e+08	8.24189					1|32	2173	960.4	1.871	97590000	41770000	10610000	23.17	0.0008777	9367	1.06153e+08	8.02593				1|31	2144	929.6
	1|33	2204	989.8	2.869	144600000	50660000	15320000	19.3	0.0008237	12690	1.53217e+08	8.18531	0.888889	-0.0284429		1|33	2204	989.8	2.871	160100000	43160000	16570000	15.09	0.0008108	13510	1.65816e+08	8.21963	0.745968	-0.0248747			1|33	2202	989.7	2.85	90910000	40380000	9944000	23.95	0.0008868	8868	9.94745e+07	7.99771	0.941884	-0.0335771		1|32	2174	959.7
	1|34	2233	1019	3.815	135900000	49630000	14460000	20.06	0.0008334	12120	1.44679e+08	8.1604	5	5		1|34	2234	1021	3.872	152000000	42830000	15790000	15.73	0.0008188	13000	1.57919e+08	8.19843	5	5			1|34	2232	1019	3.848	83870000	38790000	9238000	24.82	0.0008979	8341	9.24058e+07	7.9657	5	5		1|33	2205	991
	1|35	2264	1050	4.877	125800000	48260000	13470000	20.99	0.0008463	11460	1.34739e+08	8.12949	0.124242	0.124242		1|35	2265	1051	4.898	142600000	42070000	14860000	16.44	0.0008314	12420	1.48676e+08	8.17224	0.102823	0.102823			1|35	2263	1050	4.872	77250000	37240000	8573000	25.74	0.0009056	7808	8.57577e+07	7.93327	0.128257	0.128257		1|34	2234	1020
	1|36	2294	1080	5.867	117200000	47020000	12620000	21.87	0.0008574	10880	1.2628e+08	8.10134	21.0993	8.126		1|36	2295	1081	5.89	134200000	41480000	14040000	17.18	0.0008395	11850	1.40464e+08	8.14757	16.5161	8.1697			1|36	2292	1079	5.87	70940000	35640000	7937000	26.68	0.0009157	7309	7.93895e+07	7.89976	25.8606	7.92898		1|35	2265	1051
	1|37	2324	1110	6.882	108400000	45530000	11750000	22.79	0.000867	10250	1.17574e+08	8.07031		1.33658e+08		1|37	2324	1110	6.883	125000000	40580000	13140000	17.99	0.0008509	11240	1.31422e+08	8.11867		1.4781e+08			1|37	2321	1109	6.841	65190000	34060000	7353000	27.58	0.0009246	6837	7.35515e+07	7.86659		8.49132e+07		1|36	2293	1079
	1|38	2353	1139	7.85	99820000	43970000	10900000	23.77	0.0008784	9632	1.09075e+08	8.03773				1|38	2355	1141	7.9	115500000	39480000	12200000	18.87	0.0008634	10600	1.22061e+08	8.08658					1|38	2352	1140	7.852	59260000	32300000	6747000	28.6	0.0009333	6333	6.7491e+07	7.82925				1|37	2324	1110
	1|39	2383	1170	8.871	91090000	42170000	10030000	24.84	0.0008894	8975	1.00378e+08	8.00164				1|39	2384	1170	8.868	107000000	38450000	11370000	19.76	0.0008743	9996	1.13699e+08	8.05576					1|39	2382	1170	8.84	53210000	30330000	6123000	29.69	0.0009427	5804	6.12471e+07	7.78709				1|38	2353	1139
	1|40	2413	1199	9.847	82740000	40270000	9199000	25.95	0.0009016	8341	9.20195e+07	7.96388				1|40	2414	1201	9.89	97950000	37090000	10470000	20.74	0.0008856	9324	1.04737e+08	8.0201					1|40	2412	1200	9.847	47380000	28270000	5516000	30.82	0.0009549	5297	5.5173e+07	7.74173				1|39	2384	1170
	1|41	2444	1231	10.88	74210000	38140000	8342000	27.2	0.0009141	7668	8.34373e+07	7.92136				1|41	2444	1231	10.88	89410000	35700000	9624000	21.76	0.0008968	8679	9.62738e+07	7.98351					1|41	2443	1230	10.88	41890000	26190000	4939000	32.01	0.0009621	4778	4.94033e+07	7.69376				1|40	2414	1200
	1|42	2474	1261	11.87	66690000	36060000	7580000	28.4	0.0009234	7039	7.58148e+07	7.87975				1|42	2474	1260	11.87	80810000	34070000	8767000	22.86	0.0009096	8020	8.76985e+07	7.94299					1|42	2472	1259	11.84	36780000	24110000	4397000	33.25	0.0009716	4296	4.3978e+07	7.64324				1|41	2444	1230
	1|43	2504	1290	12.88	58320000	33460000	6722000	29.85	0.0009385	6343	6.72369e+07	7.82761	1.51485	-0.056179		1|43	2504	1290	12.88	72630000	32340000	7948000	24.01	0.0009209	7360	7.95047e+07	7.90039	1.13462	-0.0459372			1|43	2501	1289	12.81	31970000	21970000	3878000	34.5	0.0009789	3817	3.87913e+07	7.58873	1.29897	-0.0630536		1|42	2475	1261
	1|44	2533	1320	13.84	51570000	31190000	6025000	31.16	0.0009468	5737	6.02684e+07	7.78009	15	15		1|44	2533	1319	13.83	65320000	30600000	7211000	25.1	0.0009318	6757	7.21323e+07	7.85813	15	15			1|44	2532	1319	13.84	27120000	19630000	3347000	35.89	0.0009885	3328	3.34788e+07	7.52477	15	15		1|43	2505	1291
	1|45	2563	1350	14.85	44590000	28600000	5296000	32.68	0.0009593	5109	5.29738e+07	7.72406	0.148515	0.148515		1|45	2564	1350	14.87	58150000	28710000	6483000	26.28	0.0009428	6147	6.48513e+07	7.81192	0.125	0.125			1|45	2563	1350	14.87	22920000	17470000	2881000	37.32	0.0009989	2894	2.88189e+07	7.45968	0.134021	0.134021		1|44	2533	1319
	1|46	2594	1380	15.86	38440000	26140000	4647000	34.21	0.0009711	4538	4.64858e+07	7.66732	32.9072	7.71563		1|46	2596	1382	15.91	51550000	26790000	5807000	27.46	0.0009532	5567	5.80957e+07	7.76414	26.4275	7.80595			1|46	2592	1380	15.84	19570000	15610000	2503000	38.58	0.001006	2531	2.50331e+07	7.39851	37.4889	7.45148		1|45	2563	1349
	1|47	2623	1409	16.83	33040000	23750000	4068000	35.71	0.0009818	4016	4.06903e+07	7.60949		5.19559e+07		1|47	2624	1410	16.86	46150000	25140000	5253000	28.58	0.0009614	5079	5.25532e+07	7.7206		6.39656e+07			1|47	2622	1409	16.83	16580000	13860000	2160000	39.9	0.001011	2197	2.16101e+07	7.33466		2.828e+07		1|46	2594	1380
	1|48	2654	1441	17.86	28020000	21330000	3520000	37.29	0.000991	3508	3.52149e+07	7.54673				1|48	2654	1441	17.89	40430000	23180000	4659000	29.82	0.000974	4564	4.66036e+07	7.66842					1|48	2653	1440	17.83	14040000	12270000	1864000	41.17	0.001016	1905	1.8646e+07	7.27059				1|47	2624	1411
	1|49	2683	1469	18.83	23840000	19130000	3056000	38.75	0.001	3074	3.05664e+07	7.48524				1|49	2683	1469	18.85	35730000	21460000	4167000	30.99	0.0009821	4115	4.16793e+07	7.61992					1|49	2682	1469	18.84	11800000	10800000	1599000	42.46	0.001023	1645	1.59962e+07	7.20402				1|48	2653	1439
	1|50	2714	1501	19.88	20050000	16960000	2626000	40.23	0.001005	2653	2.62611e+07	7.41931				1|50	2713	1499	19.83	31610000	19820000	3730000	32.1	0.0009897	3712	3.73098e+07	7.57182					1|50	2713	1501	19.87	9936000	9494000	1374000	43.7	0.001027	1419	1.37426e+07	7.13807				1|49	2684	1470
	1|51	2743	1529	20.82	17140000	15170000	2288000	41.52	0.001014	2334	2.2889e+07	7.35963				1|51	2744	1530	20.87	27620000	18120000	3303000	33.27	0.0009969	3311	3.30333e+07	7.51895					1|51	2742	1529	20.83	8431000	8379000	1188000	44.82	0.001031	1232	1.18865e+07	7.07505				1|50	2713	1500
	1|52	2773	1560	21.83	14460000	13440000	1974000	42.89	0.00102	2024	1.97415e+07	7.29538				1|52	2773	1559	21.83	24200000	16550000	2931000	34.37	0.001004	2961	2.9318e+07	7.46713					1|52	2772	1559	21.81	7120000	7365000	1024000	45.97	0.001037	1068	1.02439e+07	7.01047				1|51	2744	1530
	1|53	2803	1589	22.82	12140000	11840000	1696000	44.27	0.001025	1748	1.69577e+07	7.22937	1.23301	-0.0642394		1|53	2804	1591	22.86	21150000	15080000	2597000	35.49	0.00101	2637	2.59755e+07	7.41456	1.05882	-0.0549472			1|53	2803	1590	22.87	5885000	6365000	866600	47.24	0.001037	903.5	8.66871e+06	6.93795	1.10526	-0.0680943		1|52	2775	1561
	1|54	2834	1620	23.84	10230000	10430000	1460000	45.57	0.001031	1514	1.46095e+07	7.16464	25	25		1|54	2834	1620	23.82	18600000	13780000	2315000	36.54	0.001013	2358	2.31484e+07	7.36452	25	25			1|54	2833	1620	23.86	4910000	5536000	739700	48.43	0.001044	776.4	7.39969e+06	6.86921	25	25		1|53	2804	1590
	1|55	2864	1650	24.83	8643000	9208000	1263000	46.81	0.001033	1312	1.26289e+07	7.10136	0.165049	0.165049		1|55	2863	1649	24.82	16110000	12440000	2035000	37.67	0.001019	2086	2.0354e+07	7.30865	0.176471	0.176471			1|55	2863	1650	24.85	4096000	4810000	631500	49.58	0.001047	664.9	6.3177e+06	6.80056	0.157895	0.157895		1|54	2835	1621
	1|56	2894	1681	25.86	7246000	8068000	1084000	48.08	0.001037	1131	1.08442e+07	7.0352	47.0196	7.09044		1|56	2894	1680	25.84	13950000	11200000	1789000	38.75	0.001025	1845	1.78897e+07	7.2526	37.8606	7.29876			1|56	2891	1679	25.8	3453000	4208000	544200	50.63	0.001046	572.3	5.44339e+06	6.73587	49.7458	6.79034		1|55	2863	1649
	1|57	2923	1709	26.81	6110000	7089000	935600	49.24	0.001042	980.7	9.35874e+06	6.97122		1.23153e+07		1|57	2923	1709	26.81	12150000	10110000	1580000	39.77	0.00103	1637	1.58062e+07	7.19883		1.98957e+07			1|57	2923	1710	26.86	2840000	3610000	459200	51.81	0.001052	486	4.59322e+06	6.66212		6.17085e+06		1|56	2895	1681
	1|58	2953	1739	27.81	5168000	6241000	810100	50.37	0.001042	849.1	8.10298e+06	6.90864				1|58	2954	1740	27.85	10390000	8996000	1374000	40.9	0.001035	1429	1.37434e+07	7.13809					1|58	2952	1739	27.82	2376000	3132000	393000	52.81	0.001054	416.6	3.93126e+06	6.59453				1|57	2924	1710
	1|59	2983	1769	28.81	4340000	5454000	696800	51.49	0.001045	732.3	6.97006e+06	6.84324				1|59	2984	1770	28.82	9088000	8130000	1219000	41.82	0.001039	1274	1.21938e+07	7.08614					1|59	2982	1770	28.84	1956000	2680000	331700	53.89	0.001055	352	3.31788e+06	6.52086				1|58	2953	1739
	1|60	3013	1799	29.79	3677000	4795000	604100	52.52	0.00105	637.9	6.04255e+06	6.78122				1|60	3014	1801	29.86	7756000	7205000	1058000	42.89	0.001043	1110	1.05862e+07	7.02474					1|60	3012	1800	29.83	1630000	2317000	283200	54.87	0.001058	301.3	2.83291e+06	6.45223				1|59	2986	1772
	1|61	3043	1829	30.83	3033000	4128000	512100	53.69	0.001055	543.1	5.12245e+06	6.70948				1|61	3044	1831	30.87	6666000	6408000	924400	43.87	0.001045	971.8	9.24651e+06	6.96598					1|61	3043	1830	30.87	1345000	1988000	239900	55.92	0.001059	255.4	2.40024e+06	6.38026				1|60	3014	1800
	1|62	3074	1860	31.82	2588000	3642000	446700	54.6	0.001054	473.5	4.46788e+06	6.6501				1|62	3073	1859	31.81	5782000	5728000	813700	44.73	0.001052	861	8.13889e+06	6.91057					1|62	3073	1860	31.84	1130000	1726000	206300	56.78	0.001064	220.6	2.063e+06	6.3145				1|61	3043	1829
	1|63	3104	1890	32.84	2166000	3162000	383100	55.59	0.001053	405.9	3.83273e+06	6.58351	0.919192	-0.0642551		1|63	3103	1890	32.81	5000000	5109000	714600	45.62	0.001052	755.8	7.14856e+06	6.85422	0.872549	-0.0633843			1|63	3103	1890	32.83	949500	1500000	177500	57.66	0.001059	189	1.77526e+06	6.24926	0.876289	-0.0645319		1|62	3073	1859
	1|64	3134	1920	33.84	1811000	2741000	328400	56.56	0.001057	349.2	3.28524e+06	6.51657	35	35		1|64	3134	1920	33.82	4267000	4502000	620100	46.53	0.001053	656.9	6.20285e+06	6.79259	35	35			1|64	3132	1919	33.83	791000	1297000	151800	58.61	0.001061	162	1.51917e+06	6.18161	35	35		1|63	3103	1889
	1|65	3164	1950	34.85	1506000	2367000	280400	57.53	0.00106	299	2.80548e+06	6.44801	0.151515	0.151515		1|65	3163	1949	34.78	3714000	4029000	547800	47.33	0.001052	579.6	5.47966e+06	6.73875	0.215686	0.215686			1|65	3162	1950	34.83	664400	1128000	130900	59.5	0.001064	140	1.30913e+06	6.11698	0.175258	0.175258		1|64	3134	1920
	1|66	3194	1980	35.84	1268000	2065000	242300	58.44	0.001063	259	2.42323e+06	6.38439	57.6679	6.43837		1|66	3193	1979	35.8	3146000	3521000	472100	48.22	0.001059	502.8	4.72173e+06	6.6741	47.522	6.72481			1|66	3192	1979	35.8	560700	985000	113300	60.35	0.001062	121	1.13341e+06	6.05439	59.649	6.10601		1|65	3163	1949
	1|67	3224	2010	36.83	1054000	1779000	206700	59.37	0.001066	221.5	2.06779e+06	6.31551		2.74391e+06		1|67	3224	2011	36.84	2695000	3103000	410800	49.02	0.001058	437.2	4.10994e+06	6.61384		5.30651e+06			1|67	3222	2009	36.8	467400	849400	96920	61.18	0.001066	103.9	969507	5.98655		1.27647e+06		1|66	3196	1982
	1|68	3252	2039	37.76	893200	1554000	179200	60.11	0.001065	191.9	1.79241e+06	6.25344				1|68	3253	2039	37.8	2321000	2743000	359200	49.76	0.001061	383.2	3.5932e+06	6.55548					1|68	3252	2039	37.8	389600	731500	82850	61.96	0.001065	88.7	828782	5.91844				1|67	3223	2009
	1|69	3283	2069	38.77	733800	1323000	151200	60.98	0.001066	162.2	1.51288e+06	6.1798				1|69	3283	2069	38.78	1992000	2414000	312900	50.48	0.001064	334.7	3.12977e+06	6.49551					1|69	3282	2069	38.81	322700	627200	70510	62.77	0.001067	75.63	705348	5.8484				1|68	3253	2039
	1|70	3313	2099	39.76	613200	1141000	129500	61.75	0.001066	138.8	1.29534e+06	6.11238				1|70	3313	2099	39.78	1716000	2130000	273400	51.14	0.001063	292.4	2.73524e+06	6.437					1|70	3312	2099	39.81	271500	544700	60850	63.51	0.00107	65.46	608613	5.78434				1|69	3284	2070
	1|71	3343	2129	40.79	503600	970300	109300	62.57	0.001071	117.7	1.0932e+06	6.0387				1|71	3344	2130	40.81	1471000	1870000	237800	51.81	0.001068	255.3	2.37923e+06	6.37644					1|71	3344	2132	40.86	223500	465500	51620	64.35	0.001073	55.7	516374	5.71296				1|70	3313	2099
	1|72	3373	2159	41.79	420800	837600	93710	63.33	0.001071	100.9	937361	5.97191				1|72	3373	2159	41.79	1257000	1637000	206300	52.47	0.001071	222.2	2.06393e+06	6.3147					1|72	3373	2160	41.84	187300	403500	44470	65.11	0.001072	47.95	444852	5.64822				1|71	3343	2129
	1|73	3403	2189	42.8	347800	715900	79560	64.09	0.001069	85.5	795913	5.90087	0.68	-0.0661421		1|73	3404	2191	42.84	1076000	1431000	179000	53.07	0.001069	192.4	1.7904e+06	6.25295	0.466667	-0.0587089			1|73	3402	2190	42.78	157700	349400	38320	65.72	0.001076	41.48	383340	5.58358	0.686275	-0.0720654		1|72	3374	2160
	1|74	3432	2219	43.74	294400	623400	68920	64.72	0.001072	74.27	689419	5.83848	45	45		1|74	3433	2219	43.8	926800	1258000	156200	53.61	0.001072	168.4	1.56254e+06	6.19383	45	45			1|74	3431	2219	43.79	130100	299900	32680	66.55	0.001073	35.28	326904	5.51442	45	45		1|73	3405	2191
	1|75	3462	2249	44.77	243100	531700	58440	65.42	0.001072	63.02	584639	5.76689	0.23	0.23		1|75	3463	2249	44.77	806900	1113000	137400	54.06	0.001073	148.3	1.37472e+06	6.13821	0.219048	0.219048			1|75	3463	2250	44.82	107300	256900	27830	67.34	0.001076	30.13	278408	5.44468	0.176471	0.176471		1|74	3434	2220
	1|76	3493	2279	45.77	203400	459000	50190	66.1	0.001074	54.2	502048	5.70075	65.5764	5.75167		1|76	3495	2281	45.82	691800	971700	119200	54.55	0.00107	128.3	1.19281e+06	6.07657	54.1673	6.12471			1|76	3493	2280	45.84	87910	218000	23500	68.04	0.001074	25.39	235058	5.37117	67.4635	5.43171		1|75	3464	2250
	1|77	3525	2311	46.76	170100	395800	43070	66.75	0.001081	46.83	430803	5.63428		564514		1|77	3523	2310	46.79	598300	853000	104200	54.95	0.001077	112.8	1.04191e+06	6.01783		1.33264e+06			1|77	3522	2309	46.77	73380	189100	20280	68.79	0.001077	21.97	202838	5.30715		270215		1|76	3495	2281
	1|78	3553	2340	47.79	142000	340800	36910	67.38	0.001076	39.92	369200	5.56726				1|78	3555	2341	47.84	514200	744600	90460	55.38	0.001078	98.08	904893	5.9566					1|78	3553	2340	47.81	59330	159200	16980	69.56	0.001079	18.42	169896	5.23018				1|77	3524	2310
	1|79	3584	2370	48.8	117300	291300	31400	68.06	0.001081	34.14	314030	5.49697				1|79	3583	2369	48.77	450900	661200	80010	55.71	0.001078	86.76	800310	5.90326					1|79	3582	2369	48.79	48460	135200	14360	70.28	0.001079	15.59	143622	5.15722				1|78	3553	2339
	1|80	3614	2400	49.78	99440	254100	27280	68.63	0.001079	29.6	272865	5.43595				1|80	3614	2401	49.81	388900	577500	69610	56.05	0.001078	75.43	696240	5.84276					1|80	3613	2400	49.82	39170	114300	12080	71.09	0.001081	13.14	120825	5.08216				1|79	3584	2370
	1|81	3643	2429	50.78	82100	217300	23220	69.3	0.001083	25.29	232292	5.36603				1|81	3643	2429	50.79	338100	507300	60950	56.32	0.00108	66.2	609643	5.78508					1|81	3642	2429	50.76	32670	98590	10380	71.66	0.001084	11.32	103862	5.01646				1|80	3616	2402
	1|82	3673	2459	51.77	69640	189100	20140	69.78	0.001081	21.89	201516	5.30431				1|82	3673	2460	51.79	293100	444200	53200	56.57	0.001083	57.93	532185	5.72606					1|82	3672	2459	51.78	26860	84480	8862	72.36	0.001083	9.653	88647.2	4.94767				1|81	3643	2429
	1|83	3704	2490	52.78	58100	163400	17330	70.42	0.001079	18.82	173422	5.2391	0.554455	-0.0646997		1|83	3703	2489	52.78	256800	393200	46950	56.85	0.001082	51.1	469630	5.67176	0.237624	-0.0583595			1|83	3702	2489	52.79	21850	72000	7522	73.11	0.001084	8.198	75242.4	4.87646	0.485437	-0.0677029		1|82	3674	2460
	1|84	3734	2520	53.81	47980	140200	14810	71.1	0.001082	16.12	148183	5.1708	55	55		1|84	3733	2519	53.76	225200	347200	41370	57.03	0.001083	45.04	413839	5.61683	55	55			1|84	3732	2519	53.76	18030	61980	6453	73.78	0.00109	7.076	64549.2	4.80989	55	55		1|83	3703	2489
	1|85	3764	2550	54.81	39940	121200	12760	71.76	0.001087	13.94	127611	5.10589	0.188119	0.188119		1|85	3764	2550	54.79	197700	306600	36470	57.18	0.001086	39.81	364813	5.56207	0.207921	0.207921			1|85	3763	2550	54.81	14850	53430	5544	74.46	0.001083	6.04	55455.3	4.74394	0.184466	0.184466		1|84	3733	2519
	1|86	3794	2580	55.82	33340	104600	10970	72.32	0.001085	11.97	109785	5.04054	71.8653	5.0936		1|86	3794	2580	55.8	171500	268400	31840	57.42	0.001089	34.89	318513	5.50313	57.2299	5.54982			1|86	3794	2582	55.84	12260	45610	4721	74.96	0.00109	5.173	47229	4.67421	74.5522	4.73108		1|85	3763	2549
	1|87	3824	2610	56.77	28470	91770	9606	72.76	0.001088	10.51	96084.7	4.98265		124050		1|87	3824	2610	56.78	152600	240500	28480	57.61	0.001086	31.09	284828	5.45458		354663			1|87	3821	2609	56.74	10230	39920	4120	75.63	0.001095	4.538	41209.9	4.615		53836.8		1|86	3794	2580
	1|88	3852	2639	57.75	23810	79560	8303	73.34	0.001089	9.093	83046.4	4.91932				1|88	3854	2640	57.81	133400	211300	24990	57.73	0.001086	27.29	249886	5.39774					1|88	3853	2640	57.8	8527	35000	3601	76.31	0.001086	3.933	36023.7	4.55659				1|87	3823	2609
	1|89	3883	2669	58.76	19890	69150	7194	73.95	0.001092	7.902	71953.7	4.85705				1|89	3883	2669	58.78	118900	189500	22370	57.9	0.001085	24.41	223713	5.34969					1|89	3881	2669	58.74	7339	30510	3138	76.48	0.00109	3.438	31380.3	4.49666				1|88	3853	2639
	1|90	3913	2700	59.76	16910	60090	6240	74.28	0.00109	6.84	62424	4.79535				1|90	3914	2700	59.8	105200	168900	19890	58.09	0.001089	21.78	198983	5.29882					1|90	3912	2700	59.76	5984	26770	2742	77.4	0.001088	3.001	27430.7	4.43824				1|89	3883	2669
	1|91	3943	2729	60.74	14160	52650	5451	74.94	0.001087	5.958	54520.9	4.73656				1|91	3943	2729	60.77	93400	150800	17730	58.22	0.001092	19.47	177382	5.24891					1|91	3942	2730	60.78	5081	23240	2378	77.67	0.001094	2.617	23789	4.37638				1|90	3914	2700
	1|92	3974	2760	61.81	11570	45250	4669	75.65	0.001091	5.124	46705.8	4.66937				1|92	3974	2760	61.78	82970	134700	15820	58.38	0.001092	17.37	158203	5.19921					1|92	3974	2762	61.82	4137	20300	2071	78.48	0.001091	2.273	20717.3	4.31633				1|91	3943	2729
	1|93	4004	2790	62.78	9849	39730	4092	76.08	0.001093	4.498	40932.6	4.61207	0.209524	-0.0625954		1|93	4003	2789	62.75	74330	121800	14270	58.61	0.001093	15.68	142689	5.15439	0.287129	-0.0464191			1|93	4003	2790	62.8	3427	17810	1813	79.11	0.001099	2.005	18136.7	4.25856	0.53	-0.0612209		1|92	3973	2759
	1|94	4034	2820	63.77	8358	34870	3585	76.52	0.001097	3.956	35857.7	4.55458	65	65		1|94	4033	2819	63.75	66100	109000	12740	58.76	0.001092	14	127476	5.10543	65	65			1|94	4033	2821	63.79	2873	15680	1594	79.62	0.001094	1.753	15941	4.20252	65	65		1|93	4003	2789
	1|95	4063	2849	64.72	7033	30850	3163	77.16	0.001092	3.473	31641.5	4.50026	0.266667	0.266667		1|95	4064	2850	64.78	58210	97120	11320	59.06	0.001095	12.46	113229	5.05396	0.217822	0.217822			1|95	4063	2850	64.78	2413	13680	1388	79.99	0.001088	1.519	13891.2	4.14274	0.22	0.22		1|94	4034	2820
	1|96	4095	2881	65.77	5945	26540	2719	77.38	0.001099	3.005	27197.7	4.43453	77.2187	4.48273		1|96	4094	2880	65.79	51820	87440	10160	59.35	0.001094	11.18	101642	5.00707	59.1232	5.04374			1|96	4093	2880	65.78	1987	11900	1206	80.52	0.001089	1.322	12064.7	4.08152	80.1066	4.12927		1|95	4065	2851
	1|97	4123	2909	66.74	4997	23560	2408	78.03	0.001098	2.66	24084.1	4.38173		30390		1|97	4123	2909	66.75	45540	77920	9022	59.7	0.001099	9.967	90252	4.95546		110597			1|97	4123	2910	66.8	1637	10560	1069	81.19	0.001091	1.172	10686.1	4.02882		13467		1|96	4093	2880
	1|98	4154	2940	67.79	3960	20070	2045	78.84	0.001112	2.287	20456.9	4.31084				1|98	4154	2940	67.77	41070	70720	8175	59.86	0.001093	8.986	81780.6	4.91265					1|98	4152	2939	67.74	1402	9212	931.6	81.35	0.001091	1.022	9318.08	3.96933				1|97	4124	2910
	1|99	4184	2970	68.78	3472	17910	1824	79.03	0.001098	2.014	18243.4	4.26111				1|99	4184	2971	68.8	36090	63560	7308	60.41	0.0011	8.085	73091.5	4.86387					1|99	4182	2969	68.72	1183	8101	818.4	81.69	0.001092	0.8989	8186.92	3.91312				1|98	4153	2939
	1|100	4212	2999	69.74	2947	16050	1631	79.6	0.001098	1.802	16318.3	4.21268				1|100	4214	3001	69.75	32360	57900	6631	60.8	0.001098	7.325	66329.3	4.82171					1|100	4212	3000	69.77	946.7	7236	729.6	82.55	0.001094	0.8025	7297.67	3.86318				1|99	4184	2970
	1|101	4243	3029	70.72	2454	14210	1442	80.2	0.001095	1.587	14420.3	4.15898				1|101	4243	3029	70.73	28770	52770	6008	61.4	0.001102	6.656	60103.1	4.7789					1|101	4243	3031	70.78	824.6	6291	634.4	82.53	0.001094	0.6981	6344.81	3.80242				1|100	4213	2999
	1|102	4273	3059	71.71	2086	12430	1260	80.48	0.001095	1.387	12603.8	4.1005				1|41	2075	1229	70.85	15170	27900	3175	61.47	0.001044	52.1	31757.5	4.50185					1|102	4272	3059	71.75	626	5613	564.7	83.64	0.001096	0.6221	5647.8	3.75188				1|101	4243	3029
	1|103	4303	3089	72.73	1720	11030	1116	81.14	0.001097	1.23	11163.3	4.04779				1|42	2107	1261	71.9	13340	25180	2849	62.08	0.001047	46.88	28495.4	4.45477					1|103	4302	3089	72.73	537.6	4922	495	83.77	0.001096	0.5458	4951.27	3.69472	0.701031			1|41	2075	1229
	1|104	4333	3120	73.74	1440	9626	973.1	81.49	0.001097	1.074	9733.11	3.98825				1|43	2136	1290	72.88	11830	22860	2573	62.65	0.001049	42.41	25739.6	4.4106	0.693069	-0.046371			1|104	4333	3120	73.76	422	4360	437.9	84.47	0.001097	0.4833	4380.37	3.64151	75			1|42	2107	1261
	1|105	4363	3150	74.73	1221	8543	862.7	81.87	0.001098	0.9529	8629.81	3.936				1|44	2165	1319	73.82	10600	21020	2354	63.23	0.001049	38.8	23541.5	4.37183	75	75			1|105	4363	3150	74.78	355.4	3851	386.7	84.73	0.001099	0.4273	3867.36	3.58742	0.226804			1|43	2136	1290
	1|106	4392	3179	75.71	980.2	7748	780.8	82.79	0.0011	0.8635	7809.76	3.89264				1|45	2197	1351	74.87	9301	18990	2114	63.91	0.001048	34.82	21145.4	4.32522	0.128713	0.128713			1|106	4392	3179	75.75	275.5	3432	344.2	85.41	0.0011	0.3807	3443.04	3.53694	84.8842			1|44	2165	1319
	1|107	4423	3209	76.75	858.8	6676	672.9	82.67	0.0011	0.7445	6731.01	3.82808				1|46	2226	1380	75.88	8140	17150	1898	64.61	0.001053	31.39	18983.7	4.27838	64.0001	4.31919			1|107	4422	3209	76.75	249.8	3020	303	85.27	0.001101	0.3353	3030.31	3.48149	7.65997e+84			1|45	2195	1349
	1|108	4453	3239	77.75	673.3	6067	610.3	83.67	0.001102	0.6761	6104.25	3.78563				1|47	2256	1410	76.86	7223	15670	1725	65.25	0.00105	28.47	17254.6	4.2369	1.00023e+64	20853.9			1|108	4453	3240	77.77	205.1	2659	266.6	85.59	0.001102	0.2954	2666.9	3.42601				1|46	2225	1379
	1|109	4483	3269	78.72	584	5329	536	83.75	0.001103	0.5943	5360.9	3.72924				1|48	2285	1439	77.84	6342	14240	1559	66	0.001051	25.75	15588.4	4.1928					1|1	877.1	30.92	30.94	486900	747200	89160	56.91	0.0009435	1322	891840	5.95029				1|47	2257	1411
	1|110	4513	3299	79.74	469.6	4695	471.7	84.29	0.001104	0.5235	4718.43	3.6738				1|49	2317	1471	78.86	5599	12940	1410	66.6	0.001053	23.33	14099.4	4.1492					1|2	905.3	59.09	31.88	439400	692800	82020	57.62	0.0009487	1223	820393	5.91402				1|48	2287	1441
	1|111	4544	3330	80.76	361	4238	425.3	85.13	0.001105	0.4724	4253.35	3.62873				1|50	2346	1500	79.85	4913	11730	1271	67.27	0.001056	21.09	12717.3	4.1044					1|3	936	89.83	32.91	385800	628000	73680	58.44	0.000961	1113	737038	5.86749				1|49	2315	1469
	1|112	4573	3359	81.74	277.2	3756	376.5	85.78	0.001106	0.4188	3766.22	3.57591				1|51	2376	1530	80.85	4317	10650	1149	67.93	0.001055	19.05	11491.7	4.06038					1|4	967.4	121.2	33.96	330500	558600	64890	59.39	0.0009636	982.5	649049	5.81228				1|50	2345	1500
	1|113	4603	3389	82.72	223.1	3402	340.8	86.25	0.001107	0.3794	3409.31	3.53267				1|52	2407	1561	81.88	3790	9650	1036	68.56	0.001057	17.22	10367.6	4.01568					1|5	997.6	151.4	34.94	287200	501800	57800	60.21	0.0009702	881.1	578176	5.76206	0.98			1|51	2377	1531
	1|114	4633	3419	83.72	183.4	3008	301.3	86.51	0.001108	0.3357	3013.59	3.47908				1|53	2436	1590	82.84	3350	8762	937.7	69.08	0.001061	15.63	9380.57	3.97223	0.625	-0.0400617			1|6	1027	180.8	35.91	247600	447700	51150	61.06	0.0009752	783.8	511606	5.70894	85			1|52	2406	1560
	1|115	4664	3450	84.76	118.5	2693	269.5	87.48	0.001109	0.3005	2695.61	3.43066				1|54	2466	1620	83.84	2978	7997	853.1	69.57	0.00106	14.21	8533.49	3.93113	85	85			1|7	1057	210.9	36.88	210900	395500	44810	61.92	0.0009844	693.1	448218	5.65149	48.12			1|53	2436	1590
	1|116	4693	3479	85.71	118.5	2404	240.6	87.18	0.00111	0.2685	2406.92	3.38146				1|55	2495	1649	84.84	2626	7231	769.1	70.04	0.001062	12.83	7693.06	3.8861	0.166667	0.166667			1|8	1085	239.1	37.88	176300	344500	38690	62.9	0.0009855	599.1	386991	5.5877	109.078			1|54	2465	1619
	1|117	4723	3510	86.73	57.59	2193	219.3	88.5	0.001111	0.245	2193.76	3.34119				1|56	2525	1679	85.8	2334	6643	703.9	70.64	0.001064	11.77	7041.09	3.84764	70.14	3.87969			1|9	1115	269.2	38.88	149900	303100	33810	63.68	0.0009894	525.6	338141	5.5291	1.19564e+109			1|55	2496	1650
	1|118	4753	3539	87.71	72.88	1894	189.5	87.8	0.001112	0.2119	1895.4	3.2777				1|57	2556	1710	86.85	2079	6030	637.7	70.98	0.001065	10.67	6378.33	3.80471	1.38038e+70	7580.35			1|10	1147	301.2	39.91	125800	263800	29220	64.51	0.0009947	456.7	292260	5.46577				1|56	2525	1679
	1|119	4784	3570	88.75	25.04	1761	176.1	89.19	0.001113	0.1972	1761.18	3.2458				1|58	2586	1740	87.83	1851	5532	583.2	71.5	0.00107	9.806	5833.46	3.76593					1|11	1176	330	40.91	103100	225600	24800	65.43	0.001002	390.6	248042	5.39453				1|57	2556	1710
	1|120	4812	3599	89.68	27.76	1614	161.4	89.01	0.001115	0.1809	1614.24	3.20797				1|59	2615	1769	88.82	1664	5085	534.9	71.88	0.001065	8.95	5350.34	3.72838					1|12	1207	360.7	41.92	86650	196500	21470	66.21	0.001004	338.8	214757	5.33195				1|58	2587	1741
	1|121	4843	3629	90.72	30.78	1444	144.4	88.78	0.001115	0.162	1444.33	3.15967				1|60	2645	1799	89.82	1485	4648	487.8	72.28	0.001066	8.168	4879.46	3.68837					1|13	1236	390.2	42.9	72570	171000	18570	67	0.001002	292.2	185762	5.26896				1|59	2616	1770
	1|122	4874	3660	91.73	48.81	1289	128.9	87.83	0.001117	0.1448	1289.92	3.11056				1|61	2677	1831	90.87	1310	4178	437.7	72.6	0.001067	7.338	4378.56	3.64133					1|14	1266	419.6	43.88	59760	146200	15790	67.77	0.001012	251.1	157942	5.1985				1|60	2646	1800
	1|123	4904	3690	92.73	54.14	1174	117.5	87.36	0.001117	0.1321	1175.25	3.07013				1|62	2705	1859	91.78	1192	3852	403.1	72.81	0.001067	6.759	4032.22	3.60554					1|15	1295	449.1	44.83	50030	126800	13630	68.47	0.001015	217.5	136313	5.13454	0.715789			1|61	2677	1831
	1|124	4933	3720	93.7	70.4	1062	106.4	86.21	0.001119	0.1197	1064.33	3.02708				1|63	2736	1890	92.82	1046	3479	363.1	73.26	0.001073	6.123	3632.84	3.56025	0.245098	-0.0351836			1|16	1327	480.5	45.87	41270	108800	11630	69.23	0.001015	185.5	116364	5.06582	95			1|62	2705	1859
	1|125	4963	3749	94.71	87.81	980.4	98.4	84.88	0.00112	0.1108	984.325	2.99314				1|64	2765	1919	93.81	939.2	3165	330.1	73.47	0.001069	5.544	3301.41	3.5187	95	95			1|17	1356	509.9	46.91	33450	92180	9803	70.05	0.001017	156.7	98061.5	4.9915	50.6211			1|63	2735	1890
	1|126	4993	3779	95.69	1.674	854.7	85.45	89.89	0.001121	0.09629	854.702	2.93181				1|65	2796	1950	94.83	851	2878	300	73.52	0.001077	5.078	3001.18	3.47729	0.166667	0.166667			1|18	1386	539.4	47.86	27980	80000	8473	70.73	0.001021	135.9	84751.9	4.92815	104.472			1|64	2766	1920
	1|127	5023	3809	96.71	119.5	805.9	81.45	81.56	0.001122	0.09191	814.712	2.911				1|66	2827	1980	95.85	772.4	2653	276.2	73.77	0.001072	4.653	2763.15	3.4414	73.5617	3.47131			1|19	1416	570.2	48.91	22960	68390	7212	71.44	0.00102	115.6	72141.2	4.85818	2.96699e+104			1|65	2796	1950
	1|128	5053	3839	97.7	53.98	739.5	74.13	85.83	0.001123	0.08374	741.468	2.87009				1|67	2857	2011	96.84	693.7	2411	250.9	73.95	0.001072	4.226	2508.81	3.39947	3.64474e+73	2960.13			1|20	1445	599.1	49.82	19280	59620	6264	72.08	0.001023	100.6	62659.9	4.79699				1|66	2826	1980
	1|129	5083	3869	98.7	108	673.7	68.21	80.89	0.001124	0.0771	682.302	2.83398				1|68	2886	2040	97.81	636.6	2222	231.1	74.02	0.001079	3.917	2311.39	3.36387					1|21	1475	629.1	50.85	15840	51020	5341	72.75	0.001025	86.02	53422.3	4.72772				1|67	2856	2011
	1|130	5113	3900	99.72	132.4	596.4	61.07	77.48	0.001125	0.0691	610.92	2.78598				1|69	2916	2070	98.83	570.1	2020	209.8	74.24	0.001078	3.552	2098.91	3.32199					1|22	1507	660.4	51.91	12910	43350	4522	73.42	0.001028	73.05	45231.5	4.65544				1|68	2886	2040
																1|70	2945	2099	99.8	521.6	1854	192.6	74.29	0.001082	3.274	1925.98	3.28465					1|23	1536	689.9	52.88	10760	37750	3924	74.09	0.001025	63.18	39253.5	4.59388				1|69	2915	2069
																1|71	2976	2130	100.8	483.4	1717	178.3	74.27	0.001082	3.03	1783.75	3.25133					1|24	1567	721.3	53.91	8997	32800	3400	74.66	0.001023	54.66	34011.6	4.53163				1|70	2946	2100
																1|72	3006	2160	101.8	449	1586	164.8	74.2	0.001083	2.804	1648.33	3.21704					1|25	1597	750.7	54.91	7314	27960	2889	75.34	0.001031	46.82	28900.8	4.46091				1|71	2976	2130
																1|73	3036	2190	102.8	418.4	1476	153.4	74.18	0.001079	2.601	1534.16	3.18587	-0.25	-0.0270574			1|26	1626	780.2	55.89	6124	24360	2511	75.89	0.001031	40.7	25118	4.39998				1|72	3007	2161
																1|74	3066	2220	103.8	396.4	1357	141.4	73.72	0.001091	2.423	1413.71	3.15036	105	105			1|27	1655	809	56.85	5095	21190	2179	76.48	0.001033	35.37	21793.9	4.33834				1|73	3036	2190
																1|75	3097	2251	104.8	360.2	1251	130.2	73.94	0.001088	2.226	1301.82	3.11455	0.2	0.2			1|28	1687	840.4	57.89	4225	18410	1889	77.08	0.001031	30.6	18888.6	4.2762				1|74	3066	2220
																1|76	3126	2280	105.8	343.4	1174	122.3	73.69	0.001088	2.09	1223.19	3.08749	73.89	3.10914			1|29	1715	869.2	58.85	3535	16100	1648	77.62	0.001034	26.77	16483.5	4.21705				1|75	3095	2249
																1|77	3155	2309	106.8	319	1087	113.2	73.64	0.001084	1.928	1132.84	3.05417	7.76247e+73	1285.7			1|30	1745	899.3	59.84	2931	14010	1431	78.18	0.001036	23.3	14313.3	4.15574				1|76	3125	2279
																1|78	3186	2340	107.8	294.5	1004	104.6	73.66	0.001088	1.788	1046.3	3.01966					1|31	1777	930.7	60.9	2397	12080	1231	78.78	0.001036	20.05	12315.5	4.09045				1|77	3157	2311
																1|79	3217	2370	108.8	275.4	926	96.58	73.44	0.001087	1.65	966.085	2.98502					1|32	1806	959.5	61.86	2023	10620	1081	79.21	0.001038	17.62	10811	4.03386				1|78	3185	2339
																1|80	3247	2401	109.9	260.5	859.2	89.76	73.14	0.001089	1.536	897.822	2.95319					1|33	1836	989.6	62.84	1703	9384	953.4	79.71	0.001038	15.55	9537.28	3.97942				1|79	3215	2369
																1|81	3275	2429	110.8	244	804.6	84.05	73.13	0.001093	1.443	840.784	2.92468					1|34	1866	1020	63.84	1420	8173	829.3	80.14	0.001038	13.52	8295.44	3.91884				1|80	3247	2401
																1|82	3305	2459	111.7	228.8	743.2	77.74	72.89	0.001093	1.336	777.622	2.89077					1|35	1896	1050	64.85	1181	7156	725.1	80.63	0.00104	11.85	7252.8	3.86051				1|81	3277	2431
																1|83	3336	2490	112.8	216.2	692	72.48	72.65	0.001095	1.247	724.987	2.86033	-0.26	-0.034165			1|36	1925	1079	65.85	982.6	6290	636.5	81.12	0.001042	10.42	6366.29	3.80389				1|82	3307	2461
																1|84	3365	2519	113.8	205.1	645.1	67.68	72.36	0.001093	1.162	676.92	2.83054	115	115			1|37	1957	1111	66.88	816.9	5497	555.6	81.55	0.001043	9.103	5557.37	3.74487				1|83	3335	2489
																1|85	3395	2549	114.8	193.1	608	63.78	72.38	0.001094	1.096	637.928	2.80477	0.2	0.2			1|38	1985	1139	67.8	686.4	4875	492.1	81.98	0.001044	8.071	4923.09	3.69224				1|84	3366	2520
																1|86	3426	2580	115.8	181	561.2	58.96	72.12	0.001105	1.023	589.666	2.77061	72.328	2.79794			1|39	2016	1170	68.86	562.6	4257	429.3	82.47	0.001048	7.066	4294.02	3.63286				1|85	3395	2549
																1|87	3456	2610	116.8	172.5	530.3	55.75	71.98	0.0011	0.9639	557.651	2.74636	2.12814e+72	627.969			1|40	2046	1200	69.86	476.7	3742	377.1	82.74	0.001048	6.211	3772.24	3.5766				1|86	3425	2579
																1|88	3486	2640	117.8	164.2	497.9	52.41	71.75	0.001098	0.9039	524.277	2.71956					1|41	2075	1229	70.79	405	3347	337	83.1	0.001047	5.542	3371.41	3.52781				1|87	3456	2610
																1|89	3516	2670	118.8	157.2	468.4	49.39	71.45	0.001102	0.8552	494.075	2.69379					1|42	2105	1259	71.83	330.3	2930	294.8	83.57	0.001049	4.861	2948.56	3.46961				1|88	3485	2639
																1|90	3546	2700	119.8	147.6	439.2	46.32	71.43	0.001093	0.7954	463.338	2.6659					1|43	2136	1290	72.83	280.7	2578	259.3	83.79	0.001052	4.287	2593.24	3.41384				1|89	3515	2669
																1|91	3577	2731	120.8	141	411.5	43.49	71.08	0.001102	0.7532	434.986	2.63848					1|44	2165	1319	73.82	230.5	2290	230	84.25	0.001052	3.803	2301.57	3.36202				1|90	3546	2700
																1|92	3606	2760	121.8	134.4	387.9	41.04	70.88	0.001104	0.7116	410.524	2.61334					1|45	2196	1349	74.81	196.3	2032	204.1	84.48	0.001053	3.376	2041.46	3.30994				1|91	3576	2730
																1|93	3635	2789	122.8	127.6	365.3	38.68	70.74	0.001109	0.6744	386.944	2.58765					1|46	2226	1380	75.86	161.4	1772	177.9	84.8	0.001053	2.943	1779.34	3.25026				1|92	3605	2759
																1|94	3665	2819	123.8	120.6	341.7	36.23	70.56	0.001108	0.6309	362.358	2.55914					1|47	2255	1409	76.81	137.2	1603	160.9	85.11	0.001058	2.674	1608.86	3.20652				1|93	3636	2791
																1|95	3696	2850	124.8	115.1	323.5	34.33	70.41	0.001117	0.6027	343.366	2.53576					1|48	2285	1439	77.81	106.1	1426	143	85.74	0.001052	2.362	1429.94	3.15532				1|94	3667	2821
																1|96	3725	2879	125.7	109.8	306.5	32.55	70.28	0.001106	0.5655	325.574	2.51265					1|49	2316	1470	78.84	91.82	1259	126.2	85.83	0.001054	2.09	1262.34	3.10118				1|95	3695	2849
																1|97	3756	2910	126.8	104.8	288.6	30.69	70.04	0.001107	0.5338	307.039	2.48719					1|50	2346	1500	79.83	75.26	1113	111.5	86.13	0.001058	1.853	1115.54	3.04749				1|96	3726	2880
																1|98	3785	2939	127.8	99.73	272.3	28.99	69.88	0.001108	0.5048	289.989	2.46238					1|51	2376	1529	80.82	71.51	1006	100.8	85.93	0.001054	1.67	1008.54	3.00369				1|97	3756	2910
																1|99	3817	2970	128.8	94.91	256.2	27.31	69.67	0.00111	0.4762	273.215	2.4365					1|52	2406	1560	81.82	54.73	878.5	87.99	86.43	0.001058	1.463	880.203	2.94458				1|98	3786	2940
																1|100	3845	2999	129.8	90.63	242.5	25.88	69.51	0.001111	0.4516	258.882	2.4131					1|53	2435	1589	82.79	44.71	809.6	81.06	86.84	0.00106	1.35	810.834	2.90893				1|99	3815	2969
																1|101	3876	3029	130.8	86.66	230	24.57	69.36	0.001112	0.4293	245.784	2.39055					1|54	2467	1621	83.86	40.7	709.2	71.02	86.72	0.001064	1.187	710.367	2.85148				1|100	3845	2999
																1|102	3907	3061	131.8	82.44	217.4	23.25	69.24	0.001113	0.4067	232.506	2.36643					1|55	2497	1650	84.85	36.01	646.1	64.69	86.81	0.001063	1.081	647.103	2.81097				1|101	3875	3029
																1|103	3936	3090	132.8	78.88	205.1	21.96	68.96	0.001114	0.3846	219.745	2.34192					1|56	2526	1679	85.78	26.82	579.7	58.02	87.35	0.001062	0.9684	580.32	2.76367				1|102	3906	3060
																1|104	3966	3120	133.8	75.52	195.9	20.99	68.92	0.001116	0.3681	209.953	2.32212					1|57	2556	1710	86.82	23.05	523.7	52.41	87.48	0.001069	0.8801	524.207	2.7195				1|103	3937	3091
																1|105	3996	3150	134.8	72.44	186.5	20	68.78	0.001117	0.3511	200.074	2.30119					1|58	2586	1739	87.81	16.94	471.5	47.17	87.94	0.001061	0.7866	471.804	2.67376				1|104	3965	3119
																1|106	4025	3179	135.7	70.06	178.3	19.15	68.55	0.001118	0.3365	191.571	2.28233					1|59	2616	1770	88.83	15.64	429.7	42.99	87.92	0.001067	0.7208	429.985	2.63345				1|105	3996	3150
																1|107	4056	3210	136.8	66.66	169.3	18.19	68.51	0.001119	0.32	181.951	2.25995					1|60	2646	1800	89.81	15.43	382	38.22	87.69	0.001086	0.652	382.312	2.58242				1|106	4026	3180
																1|108	4085	3239	137.7	64.09	162.2	17.44	68.45	0.001121	0.3071	174.403	2.24155					1|61	2677	1830	90.84	11.04	348.1	34.82	88.18	0.001064	0.5824	348.275	2.54192				1|107	4056	3210
																1|109	4116	3270	138.8	62.19	155.5	16.74	68.2	0.001122	0.295	167.475	2.22395					1|62	2707	1861	91.84	9.103	313.6	31.36	88.34	0.001066	0.5254	313.732	2.49656				1|108	4085	3239
																1|110	4146	3300	139.8	59.95	149.3	16.08	68.12	0.001123	0.2837	160.887	2.20652					1|63	2736	1889	92.8	6.243	287.5	28.75	88.76	0.001066	0.4817	287.568	2.45874				1|109	4115	3269
																1|111	4175	3329	140.7	57.92	143.9	15.5	68.07	0.001124	0.2739	155.119	2.19067					1|64	2766	1919	93.79	6.258	261.2	26.12	88.63	0.001068	0.4384	261.275	2.4171				1|110	4146	3300
																1|112	4206	3360	141.8	56.03	138.6	14.94	67.98	0.001126	0.2643	149.497	2.17463					1|65	2796	1949	94.8	3.949	235.9	23.59	89.04	0.00107	0.3964	235.933	2.37279				1|111	4176	3330
																1|113	4236	3390	142.8	54.21	133.8	14.43	67.94	0.001127	0.2554	144.365	2.15946					1|66	2826	1980	95.82	2.514	217.6	21.75	89.34	0.00107	0.3659	217.615	2.33769				1|112	4205	3359
																1|114	4267	3421	143.8	52.46	129.8	14	68	0.001128	0.2482	140	2.14613					1|67	2855	2009	96.77	1.169	198.7	19.86	89.66	0.001071	0.3344	198.703	2.29821				1|113	4235	3389
																1|115	4296	3450	144.8	51.86	126.1	13.63	67.64	0.001129	0.2419	136.348	2.13465					1|68	2887	2040	97.79	0.8076	177.4	17.73	89.74	0.001073	0.2989	177.402	2.24896				1|114	4265	3419
																1|116	4325	3479	145.7	50.09	122.6	13.24	67.77	0.001131	0.2352	132.438	2.12201					1|69	2916	2070	98.81	0.3853	162.9	16.28	89.86	0.001074	0.2747	162.9	2.21192				1|115	4296	3450
																1|117	4355	3509	146.7	48.73	119.3	12.89	67.79	0.001132	0.2293	128.869	2.11015					1|70	2946	2099	99.8	0.975	146.6	14.66	89.62	0.001075	0.2476	146.603	2.16614				1|116	4325	3479
																1|118	4386	3540	147.7	47.17	116	12.52	67.87	0.001133	0.223	125.224	2.09769					1|71	2976	2130	100.8	1.233	132.4	13.24	89.47	0.001076	0.2239	132.406	2.12191				1|117	4356	3510
																1|119	4416	3570	148.8	46.09	113.8	12.27	67.95	0.001135	0.2188	122.779	2.08912					1|72	3006	2160	101.8	1.294	119.6	11.96	89.38	0.001077	0.2024	119.607	2.07776				1|118	4385	3539
																1|120	4446	3600	149.8	44.97	111.8	12.05	68.08	0.001136	0.2151	120.505	2.08101					1|73	3035	2189	102.8	1.754	106	10.6	89.05	0.001079	0.1797	106.015	2.02537				1|119	4415	3569
																1|121	4475	3629	150.7	43.66	109.5	11.79	68.27	0.001137	0.2106	117.883	2.07145					1|74	3065	2219	103.8	1.172	97.02	9.7	89.31	0.00108	0.1646	97.0271	1.98689				1|120	4447	3601
																1|122	4505	3659	151.7	41.33	107.3	11.5	68.93	0.001138	0.2056	114.985	2.06064					1|75	3095	2249	104.8	0.9648	86.17	8.615	89.36	0.001081	0.1463	86.1754	1.93538				1|121	4476	3630
																1|123	4535	3689	152.7	40.22	105.2	11.26	69.07	0.00114	0.2016	112.626	2.05164					1|76	3125	2279	105.7	0.4824	80.11	8.009	89.65	0.001081	0.1361	80.1115	1.90369				1|122	4506	3660
																1|124	4565	3719	153.7	38.02	102.5	10.93	69.65	0.001141	0.196	109.324	2.03872					1|77	3155	2309	106.8	1.781	73	7.3	88.6	0.001083	0.1242	73.0217	1.86345				1|123	4535	3689
																1|125	4596	3750	154.7	35.48	99.07	10.52	70.29	0.001142	0.1888	105.232	2.02215					1|78	3186	2339	107.8	1.325	67.22	6.722	88.87	0.001084	0.1145	67.2331	1.82758				1|124	4565	3719
																1|126	4625	3779	155.7	34.23	97.78	10.36	70.71	0.001144	0.1861	103.598	2.01535					1|79	3216	2370	108.8	0.8631	61.47	6.146	89.2	0.001086	0.1048	61.4761	1.78871				1|125	4596	3750
																1|127	4655	3809	156.7	31.19	94.93	9.989	71.81	0.001145	0.1797	99.9226	1.99966					1|80	3247	2400	109.8	1.194	55.99	5.599	88.78	0.001087	0.09559	56.0027	1.74821				1|126	4626	3780
																1|128	4686	3840	157.7	28.08	90.42	9.465	72.75	0.001146	0.1705	94.6798	1.97626					1|81	3275	2429	110.8	1.423	52.36	5.236	88.44	0.001088	0.08952	52.3793	1.71916				1|127	4655	3809
																1|129	4715	3869	158.7	25.5	86.71	9.035	73.61	0.001148	0.1629	90.3818	1.95608					1|82	3305	2459	111.8	1.016	48.55	4.855	88.8	0.001089	0.08309	48.5606	1.68628				1|128	4685	3839
																1|130	4746	3900	159.7	23	81.32	8.448	74.21	0.001149	0.1525	84.51	1.92691					1|83	3336	2490	112.7	0.9614	43.95	4.395	88.75	0.00109	0.07529	43.9605	1.64306				1|129	4716	3870
																1|131	4776	3930	160.7	20.49	76.72	7.939	75.05	0.00115	0.1435	79.4091	1.89987					1|84	3367	2521	113.8	0.9706	41.66	4.166	88.67	0.001091	0.07145	41.6713	1.61984				1|130	4745	3899
																1|132	4805	3959	161.7	17.73	72.44	7.456	76.25	0.001152	0.1349	74.5782	1.87261					1|85	3397	2551	114.8	1.142	38.4	3.841	88.3	0.001093	0.06594	38.417	1.58452				1|131	4776	3930
																1|133	4837	3991	162.7	15.46	67.18	6.892	77.04	0.001153	0.1249	68.9359	1.83845					1|86	3426	2580	115.8	0.8759	35.31	3.531	88.58	0.001093	0.06067	35.3209	1.54803				1|132	4806	3960
																1|134	4865	4019	163.7	14.9	63.3	6.501	76.76	0.001154	0.1179	65.03	1.81311					1|87	3455	2609	116.7	1.152	32.75	3.276	87.99	0.001095	0.05637	32.7703	1.51548				1|133	4835	3989
																1|135	4896	4050	164.7	13.29	57.63	5.913	77.01	0.001155	0.1073	59.1425	1.7719					1|88	3485	2639	117.8	1.264	30.67	3.069	87.64	0.001096	0.05286	30.696	1.48708				1|134	4865	4019
																1|136	4925	4079	165.7	12.2	53.46	5.482	77.14	0.001157	0.09965	54.8344	1.73905					1|89	3515	2669	118.7	1.113	28.95	2.896	87.8	0.001097	0.04994	28.9714	1.46197				1|135	4897	4051
																1|137	4955	4109	166.7	11.28	49.28	5.054	77.11	0.001158	0.09198	50.5545	1.70376					1|90	3546	2699	119.8	1.214	27.04	2.706	87.43	0.001099	0.04673	27.0672	1.43244				1|136	4926	4080
																1|138	4985	4139	167.7	10.81	45.72	4.697	76.7	0.00116	0.08558	46.9806	1.67192					1|91	3576	2730	120.8	2.304	25.4	2.549	84.82	0.0011	0.04406	25.5043	1.40661				1|137	4956	4110
																1|139	5015	4169	168.7	10.6	42.13	4.344	75.88	0.001161	0.07922	43.443	1.63792					1|92	3607	2761	121.8	1.094	23.81	2.383	87.37	0.001101	0.04123	23.8351	1.37722				1|138	4986	4140
																1|140	5045	4199	169.7	9.309	38.64	3.974	76.46	0.001163	0.07262	39.7455	1.59929					1|93	3636	2790	122.8	1.449	22	2.204	86.23	0.001102	0.03818	22.0477	1.34336				1|139	5016	4170
																1|141	5075	4229	170.7	8.758	36.7	3.772	76.58	0.001164	0.06897	37.7305	1.57669					1|94	3667	2820	123.8	1.372	20.94	2.098	86.25	0.001104	0.03639	20.9849	1.32191				1|140	5046	4200
																1|142	5106	4260	171.7	8.338	33.68	3.469	76.09	0.001165	0.06349	34.6968	1.54029					1|95	3695	2849	124.8	1.782	19.55	1.963	84.79	0.001105	0.03407	19.631	1.29294				1|141	5076	4230
																1|143	5136	4290	172.7	7.474	32	3.285	76.85	0.001167	0.06022	32.8612	1.51668					1|96	3726	2880	125.8	1.73	18.07	1.815	84.53	0.001106	0.03154	18.1526	1.25894				1|142	5107	4262
																1|144	5165	4318	173.7	8.543	29.69	3.089	73.95	0.001168	0.05668	30.8946	1.48988					1|97	3756	2909	126.8	1.434	17.18	1.724	85.23	0.001107	0.02999	17.2397	1.23653				1|143	5135	4289
																1|145	5195	4349	174.7	8.097	28.04	2.918	73.89	0.001169	0.05359	29.1857	1.46517					1|98	3786	2940	127.8	0.9688	16	1.602	86.53	0.001108	0.0279	16.0293	1.20491				1|144	5165	4319
																1|146	5225	4379	175.7	7.615	26.47	2.753	73.95	0.001171	0.05066	27.5436	1.44002					1|99	3816	2970	128.7	1.049	15.17	1.52	86.04	0.00111	0.0265	15.2062	1.18202				1|145	5196	4350
																1|147	5255	4409	176.7	7.764	24.29	2.549	72.27	0.001172	0.04693	25.5007	1.40655					1|100	3845	2999	129.7	1.421	13.77	1.384	84.11	0.001111	0.02416	13.8431	1.14123				1|146	5226	4380
																1|148	5286	4440	177.7	8.136	23.14	2.453	70.63	0.001173	0.04521	24.5286	1.38967															0	#NUM!				1|147	5256	4410
																1|149	5315	4469	178.7	8.225	22.85	2.427	70.2	0.001174	0.04478	24.2852	1.38534															0	#NUM!				1|148	5285	4439
																1|150	5346	4500	179.7	7.004	21.82	2.291	72.2	0.001176	0.04233	22.9166	1.36015															0	#NUM!				1|149	5315	4469
																1|151	5375	4529	180.7	7.457	21.1	2.238	70.54	0.001178	0.0414	22.3789	1.34984															0	#NUM!				1|150	5346	4500
																1|152	5405	4559	181.7	7.223	20.6	2.183	70.68	0.001179	0.04043	21.8296	1.33905															0	#NUM!				1|151	5375	4529
																1|153	5435	4589	182.7	7.294	19.12	2.046	69.12	0.00118	0.03792	20.464	1.31099															0	#NUM!				1|152	5406	4560
																1|154	5466	4619	183.7	7.457	19.04	2.044	68.61	0.001181	0.03794	20.4482	1.31065															0	#NUM!				1|153	5435	4589
																1|155	5495	4649	184.7	7.125	18.66	1.997	69.1	0.001183	0.03711	19.974	1.30047															0	#NUM!				1|154	5466	4620
																1|156	5526	4680	185.7	7.218	17.82	1.923	67.95	0.001184	0.03577	19.2263	1.2839															0	#NUM!				1|155	5496	4650
																1|157	5556	4710	186.7	6.297	16.97	1.81	69.64	0.001186	0.03371	18.1006	1.25769															0	#NUM!				1|156	5526	4680
																1|158	5587	4740	187.7	6.966	16.7	1.809	67.36	0.001187	0.03374	18.0946	1.25755															0	#NUM!				1|157	5556	4710
																1|159	5615	4769	188.7	7.132	16.29	1.778	66.36	0.001189	0.0332	17.7828	1.25															0	#NUM!				1|158	5585	4739
																1|160	5647	4801	189.7	7.469	16	1.765	64.97	0.00119	0.033	17.6575	1.24693															0	#NUM!				1|159	5616	4770
																1|161	5676	4830	190.7	6.718	16.04	1.738	67.27	0.001191	0.03253	17.39	1.2403															0	#NUM!				1|160	5645	4799
																1|162	5705	4859	191.7	6.774	16.01	1.738	67.06	0.001192	0.03256	17.3841	1.24015															0	#NUM!				1|161	5675	4829
																1|163	5736	4890	192.7	5.974	15.02	1.616	68.31	0.001194	0.03032	16.1644	1.20856															0	#NUM!				1|162	5706	4860
																1|164	5765	4919	193.7	5.913	15.17	1.628	68.71	0.001195	0.03057	16.2817	1.2117															0	#NUM!				1|163	5735	4889
																1|165	5796	4950	194.7	5.577	14.67	1.569	69.19	0.001196	0.0295	15.6943	1.19574															0	#NUM!				1|164	5765	4919
																1|166	5825	4979	195.7	5.122	14.56	1.543	70.62	0.001199	0.02907	15.4347	1.1885															0	#NUM!				1|165	5795	4949
																1|167	5856	5010	196.7	5.877	13.64	1.485	66.69	0.0012	0.02798	14.8522	1.17179															0	#NUM!				1|166	5825	4979
																1|168	5885	5039	197.7	5.819	13.92	1.508	67.32	0.001201	0.02847	15.0873	1.17861															0	#NUM!				1|167	5855	5009
																1|169	5916	5070	198.7	5.141	12.99	1.397	68.41	0.001203	0.02639	13.9703	1.14521															0	#NUM!				1|168	5886	5040
																1|170	5945	5099	199.7	4.754	12.03	1.294	68.44	0.001204	0.02448	12.9353	1.11178															0	#NUM!				1|169	5914	5068
																																										0	#NUM!				1|170	5944	5098
[truncated: 123 more columns]

## Sheet: SARA
		BM 5%	BM10%	Saturates	Resins	Aromatics	Asphaltenes
	A1	BM209	BM210	2.4	22.3	49.2	26.1
	A2	BM211	BM212	3.9	35.2	35.2	25.7
	B1	BM207	BM208	3.7	22.9	54.9	18.6
	B2	BM203	BM204	4.8	31.8	42.3	21
	C1	BM205	BM206	6.5	19.9	54.2	19.4
	C2	BM201	BM202	7.5	30.3	42.7	19.5

## Sheet: Tg 
	BM 5%	BM10%	Saturates	Resins	Aromatics	Asphaltenes	TG
A1	BM209	BM210	2.4	22.3	49.2	26.1	-12.5
A2	BM211	BM212	3.9	35.2	35.2	25.7	-18.2
B1	BM207	BM208	3.7	22.9	54.9	18.6	-15.4
B2	BM203	BM204	4.8	31.8	42.3	21	-11
C1	BM205	BM206	6.5	19.9	54.2	19.4	-22.65
C2	BM201	BM202	7.5	30.3	42.7	19.5	-26.725
																				BM 5%	BM10%	Saturates	Resins	Aromatics	Asphaltenes
																			Azalt 20/30	BM209	BM210	2.4	22.3	49.2	26.1	59.5	93.8	0.634328
																			Azalt 30/45	BM211	BM212	3.9	35.2	35.2	25.7	47.1	103.3	0.455954
																			Total L 50/70	BM207	BM208	3.7	22.9	54.9	18.6	54.9	100.7	0.545184
																			Total L 70/100	BM203	BM204	4.8	31.8	42.3	21	8	105.8	0.0756144
																			Litvinoc 70/100	BM205	BM206	6.5	19.9	54.2	19.4	14.3	105.3	0.135802
																			Litvinov 160/220	BM201	BM202	7.5	30.3	42.7	19.5	3.7	100	0.037
																									136.7	77.2
																									122.6	75.5
																									119.3	64.4
																									87.4	79.4
																									102.8	88.5
																									98.9	95.2

## Sheet: 5% tg delta
	Bitumen	TG Bitu	5% SBS TG	Saturates	Resins	Aromatics	Asphaltenes	TG 5% delta
	A1	-12.5	-2.5	2.4	22.3	49.2	26.1	10
	A2	-18.2	-17	3.9	35.2	35.2	25.7	1.2
	B1	-15.4	-13.3	3.7	22.9	54.9	18.6	2.1
	B2	-11	-15	4.8	31.8	42.3	21	-4
	C1	-22.65	-29.76	6.5	19.9	54.2	19.4	-7.11
	C2	-26.725	-27.76	7.5	30.3	42.7	19.5	-1.035

## Sheet: Morphology
		BM 5%	BM10%	Saturates	Resins	Aromatics	Asphaltenes
	A1	BM209	BM210	2.4	22.3	49.2	26.1	21.2972
	A2	BM211	BM212	3.9	35.2	35.2	25.7	24.927
	B1	BM207	BM208	3.7	22.9	54.9	18.6	29.4907
	B2	BM203	BM204	4.8	31.8	42.3	21	47.0011
	C1	BM205	BM206	6.5	19.9	54.2	19.4	71.9878
	C2	BM201	BM202	7.5	30.3	42.7	19.5	84.1454
	Area Measurement and Size Distribution
		Gesamt fläche		%fläche				Gesamt fläche		%fläche
	Gesamt	90255.1		21.273			Gesamt	69965		24.927			Gesamt	23219.2					Gesamt	13856.7					Gesamt	40717						Gesamt	20444.4
		BM209		Swelling =	21.2972			BM211		Swelling =	24.9586		BM207		29.491	Swelling =	29.4907		BM203			Swelling =	47.0011		BM205			Swelling =	71.9878			BM201			Swelling =	84.1454
				Mittlere größe=	8.76509					Mittlere größe=	14.8237					Mittlere größe=	26.7481					Mittlere größe=	31.3116					Mittlere größe=	97.7042						Mittlere größe=	157.826
		Sum Area	Sum Perim	Gütepar	0.00133783			Sum Area	Sum Perim	Gütepar	0.00210612			Sum Area	Sum Perim	Gütepar	0.00594695			Sum Area	Sum Perim	Gütepar	0.0112994			Sum Area	Sum Perim	Gütepar	0.0278712				Sum Area	Sum Perim	Gütepar	0.0797027
		19221.8	15919.2					17462.3	11850.5					6847.5	4958.97					6512.81	4159.61					29311.3	2582.87						17203	1055.74
		area	perim					area	perim
2193	1	1.5	5.856			1178	1	275.44	122.92			256	1	64.033	35.256			208	1	1.363	4.6	100		300	1	29068.9	1937.56	100			109	1	0.416	2.497	100
	2	0.147	1.757				2	73.215	40.558				2	591.774	366.158				2	8.147	13.944	100			2	0.089	1.074	100				2	0.446	3.086	100
	3	65.698	35.682				3	0.119	1.421				3	3.314	12.351				3	6.073	11.148	100			3	0.089	1.074	100				3	17188.6	935.527	100
	4	5.531	11.914				4	363.667	127.195				4	343.453	203.508				4	0.207	1.704	100			4	1.985	6.12	100				4	0.03	0.488	100
	5	8.061	14.925				5	2.348	5.483				5	0.829	3.666				5	3.673	9.016	100			5	0.089	0.974	100				5	0.03	0.488	100
	6	0.294	2.242				6	2.646	7.207				6	42.551	41.504				6	53.353	42.704	100			6	0.03	0.487	100				6	0.03	0.488	100
	7	0.118	1.213				7	69.856	34.772				7	137.742	142.724				7	3060.19	1629.14	100			7	0.385	2.636	100				7	0.149	1.32	100
	8	1.236	5.513				8	105.527	65.904				8	6.007	12.97				8	1078.95	577.406	100			8	0.03	0.487	100				8	0.03	0.488	100
	9	0.206	1.556				9	99.195	62.983				9	26.069	24.49				9	2.637	6.808	100			9	0.385	2.048	100				9	0.03	0.488	100
	10	5.09	8.684				10	11.653	13.741				10	3.137	6.745				10	0.681	3.568	100			10	0.563	2.737	100				10	0.03	0.488	100
	11	5.384	11.227				11	0.773	3.919				11	0.829	3.222				11	0.03	0.487	100			11	0.03	0.487	100				11	0.327	3.128	100
	12	0.029	0.485				12	512.266	227.617				12	0.444	2.29				12	0.03	0.487	100			12	0.03	0.487	100				12	0.03	0.488	100
	13	0.029	0.485				13	0.03	0.488				13	16.097	19.103				13	0.118	1.318	100			13	0.118	1.318	100				13	0.059	0.731	100
	14	2.383	5.697				14	0.03	0.488				14	3.225	7.475				14	0.089	0.974	100			14	0.03	0.487	100				14	0.208	1.564	100
	15	96.649	39.168				15	18.073	27.475				15	0.237	1.56				15	104.248	65.872	100			15	5.362	11.962	100				15	0.268	2.295	100
	16	0.029	0.485				16	209.538	128.7				16	61.518	58.005				16	0.089	0.974	100			16	0.03	0.487	100				16	0.03	0.488	100
	17	1.059	3.898				17	5.767	8.67				17	0.03	0.487				17	0.059	0.831	100			17	0.03	0.487	100				17	0.03	0.488	100
	18	0.029	0.485				18	0.892	5.054				18	0.118	0.973				18	0.118	1.318	100			18	0.03	0.487	100				18	1.754	7.005	100
	19	0.677	2.869				19	0.059	0.832				19	0.355	1.946				19	22.07	30.043	100			19	0.03	0.487	100				19	0.03	0.488	100
	20	0.412	2.142				20	0.446	2.295				20	4.379	9.783				20	0.148	1.318	100			20	0.148	1.318	100				20	0.357	2.153	100
	21	0.206	1.556				21	1.724	4.692				21	1.953	5.227				21	0.355	2.292	100			21	0.059	0.831	100				21	0.238	1.909	100
	22	0.088	1.171				22	1.724	5.483				22	14.085	15.395				22	0.03	0.487	100			22	0.118	1.419	100				22	0.03	0.488	100
	23	14.74	18.38				23	3.389	6.66				23	0.03	0.487				23	1.155	3.954	100			23	1.481	5.372	100				23	0.03	0.488	100
	24	43.838	27.255				24	0.03	0.488				24	1.391	6.04				24	1.244	4.541	100			24	0.148	1.561	100				24	0.059	0.975	100
	25	4.855	7.939				25	12.901	13.379				25	0.178	1.317				25	0.652	3.366	100			25	0.03	0.487	100				25	0.208	1.951	100
	26	2.972	6.383				26	0.743	3.027				26	0.03	0.487				26	0.059	0.974	100			26	0.267	2.292	100				26	0.089	0.975	100
	27	253.435	213.233				27	0.565	2.539				27	0.444	2.248				27	0.03	0.487	100			27	0.03	0.487	100				27	0.089	0.975	100
	28	1.883	6.667				28	39.179	32.787				28	101.79	66.984				28	0.059	0.831	100			28	0.089	0.974	100				28	0.119	0.975	100
	29	0.794	3.212				29	1.13	3.859				29	0.207	1.946				29	128.273	105.836	100			29	0.03	0.487	100				29	0.149	1.219	100
	30	0.853	3.212				30	2.259	5.34				30	2.426	7.03				30	0.03	0.487	100			30	0.089	0.974	100				30	0.059	0.731	100
	31	0.471	2.627				31	0.922	3.33				31	0.207	1.56				31	0.118	1.217	100			31	0.178	1.318	100				31	0.059	0.731	100
	32	0.53	2.526				32	0.03	0.488				32	1.243	4.153				32	4.562	11.878	100			32	0.03	0.487	100				32	0.03	0.488	100
	33	0.265	1.656				33	2.259	5.584				33	0.03	0.487				33	4.147	9.142	100			33	0.178	1.46	100				33	0.03	0.488	100
	34	0.147	1.313				34	0.981	3.616				34	0.651	5.067				34	0.148	1.318	100			34	0.148	1.318	100				34	0.03	0.488	100
	35	0.824	3.212				35	0.208	1.808				35	0.178	1.317				35	0.059	0.831	100			35	0.03	0.487	100				35	0.03	0.488	100
	36	6.855	10.524				36	0.713	2.884				36	0.059	0.73				36	0.652	2.938	100			36	0.118	1.318	100				36	0.03	0.488	100
	37	0.736	2.97				37	0.357	2.295				37	7.96	15.746				37	0.178	2.208	100			37	0.089	0.974	100				37	0.059	0.731	100
	38	0.177	1.313				38	1.665	4.507				38	0.03	0.487				38	5.273	9.646	100			38	0.118	1.318	100				38	0.059	0.731	100
	39	0.559	2.627				39	50.029	29.464				39	0.059	0.73				39	0.355	2.292	100			39	0.03	0.487	100				39	0.03	0.488	100
	40	0.5	2.384				40	0.892	3.33				40	0.829	4.01				40	0.03	0.487	100			40	0.681	4.885	100				40	0.743	5.423	100
	41	1.648	4.668				41	0.713	2.985				41	5.208	10.471				41	0.059	0.831	100			41	0.03	0.487	100				41	0.03	0.488	100
	42	0.088	0.97				42	24.346	18.701				42	0.296	2.878				42	0.918	4.785	100			42	0.207	1.46	100				42	0.059	0.975	100
	43	0.206	1.799				43	1.427	4.204				43	4.172	11.67				43	0.03	0.487	100			43	0.296	1.906	100				43	0.03	0.488	100
	44	0.353	2.041				44	2.705	5.97				44	0.089	1.175				44	0.326	1.906	100			44	2.103	6.103	100				44	0.03	0.488	100
	45	0.294	1.799				45	0.446	4.305				45	0.71	3.951				45	1.777	4.986	100			45	0.03	0.487	100				45	0.059	0.975	100
	46	0.677	2.869				46	0.089	0.975				46	8.847	15.823				46	0.118	0.974	100			46	0.03	0.487	100				46	0.03	0.488	100
	47	0.177	1.455				47	0.505	2.396				47	0.858	3.222				47	0.592	2.737	100			47	0.03	0.487	100				47	0.03	0.488	100
	48	0.294	1.941				48	0.119	1.32				48	1.065	3.851				48	0.148	1.318	100			48	0.089	1.074	100				48	0.238	2.295	100
	49	1.618	4.526				49	1.457	4.305				49	0.71	2.878				49	0.059	0.73	100			49	0.059	0.73	100				49	0.149	1.463	100
	50	0.618	2.727				50	0.119	0.975				50	0.148	1.216				50	0.03	0.487	100			50	0.059	0.831	100				50	0.03	0.488	100
	51	2.236	5.354				51	10.969	12.243				51	37.668	26.898				51	0.089	1.318	100			51	0.207	1.46	100				51	0.03	0.488	100
	52	0.177	1.455				52	0.149	1.219				52	35.745	37.074				52	0.03	0.487	100			52	0.03	0.487	100				52	0.119	0.975	100
	53	0.382	2.041				53	1.219	4.061				53	98.032	97.09				53	0.148	1.46	100			53	0.03	0.487	100				53	0.119	1.32	100
	54	1.353	4.283				54	2.438	5.726				54	2079.18	1048.02				54	0.296	2.535	100			54	0.059	0.73	100				54	0.059	0.731	100
	55	0.088	0.97				55	13.377	14.539				55	4.202	8.222				55	0.237	1.704	100			55	0.089	0.974	100				55	0.416	2.539	100
	56	1.118	3.798				56	35.344	22.578				56	135.079	131.13				56	0.089	1.175	100			56	0.03	0.487	100				56	0.03	0.488	100
	57	0.53	2.526				57	8.502	10.679				57	0.03	0.487				57	0.03	0.487	100			57	0.089	0.974	100				57	0.595	4.061	100
	58	3.03	6.425				58	0.446	2.254				58	0.296	1.904				58	1.777	5.272	100			58	0.148	1.561	100				58	0.03	0.488	100
	59	3.325	11.252				59	0.446	2.254				59	0.325	2.047				59	0.03	0.487	100			59	0.118	1.46	100				59	0.03	0.488	100
	60	4.766	8.039				60	0.03	0.488				60	0.207	1.46				60	0.592	3.123	100			60	0.059	0.974	100				60	0.119	0.975	100
	61	1.177	3.94				61	0.416	2.153				61	0.503	2.533				61	0.296	1.947	100			61	0.059	0.831	100				61	0.03	0.488	100
	62	5.737	11.921				62	0.684	2.985				62	27.312	32.719				62	3.97	8.269	100			62	0.178	1.704	100				62	0.03	0.488	100
	63	0.912	3.313				63	237.837	81.778				63	1.775	8.003				63	0.059	0.831	100			63	0.118	0.974	100				63	0.089	1.076	100
	64	0.912	3.354				64	0.119	0.975				64	0.266	1.804				64	1.985	5.372	100			64	0.504	2.636	100				64	0.059	0.832	100
	65	0.029	0.485				65	1.873	4.852				65	1.065	3.708				65	0.03	0.487	100			65	0.059	0.73	100				65	0.089	1.219	100
	66	0.206	1.455				66	0.03	0.488				66	15.772	18.499				66	0.118	0.974	100			66	0.148	1.318	100				66	0.089	0.975	100
	67	0.265	1.799				67	8.145	12.832				67	13.7	21.445				67	0.8	3.366	100			67	0.059	0.73	100				67	0.03	0.488	100
	68	1.059	3.697				68	0.743	3.086				68	0.414	2.248				68	0.03	0.487	100			68	0.03	0.487	100				68	0.089	1.463	100
	69	0.265	1.656				69	0.119	0.975				69	0.03	0.487				69	0.148	1.662	100			69	0.681	3.223	100				69	0.059	0.731	100
	70	1.147	3.898				70	14.774	15.228				70	0.03	0.487				70	8.265	12.466	100			70	0.059	0.974	100				70	0.059	0.731	100
	71	0.059	0.728				71	3.508	6.904				71	0.118	0.973				71	30.987	29.549	100			71	0.03	0.487	100				71	0.624	3.96	100
	72	0.265	1.799				72	0.416	2.396				72	0.473	2.391				72	3.022	6.749	100			72	0.681	3.467	100				72	0.03	0.488	100
	73	0.618	2.727				73	1.07	3.717				73	0.03	0.487				73	0.03	0.487	100			73	0.059	0.831	100				73	0.03	0.488	100
	74	0.147	1.213				74	1.932	5.037				74	0.03	0.487				74	0.207	1.906	100			74	0.296	1.805	100				74	0.03	0.488	100
	75	1.353	4.183				75	21.313	17.381				75	0.089	0.973				75	0.326	1.906	100			75	0.178	1.318	100				75	0.03	0.488	100
	76	1.618	4.768				76	1.516	4.305				76	4.172	11.326				76	0.089	1.175	100			76	0.178	1.561	100				76	0.059	0.731	100
	77	0.353	2.284				77	0.922	3.473				77	0.089	0.973				77	0.237	1.561	100			77	0.03	0.487	100				77	0.476	2.539	100
	78	8.503	10.666				78	8.621	11.773				78	37.461	39.742				78	0.385	2.292	100			78	0.03	0.487	100				78	0.059	0.731	100
	79	0.53	2.485				79	91.675	44.87				79	4.143	7.576				79	0.03	0.487	100			79	0.118	0.974	100				79	0.089	0.975	100
	80	0.059	0.828				80	0.713	2.985				80	0.769	2.978				80	714.182	294.166	100			80	0.03	0.487	100				80	0.059	0.731	100
	81	1.471	4.283				81	0.03	0.488				81	0.503	2.533				81	0.059	0.73	100			81	0.03	0.487	100				81	0.059	0.832	100
	82	1.206	3.94				82	1.159	3.919				82	6.747	11.468				82	244.726	158.478	100			82	0.03	0.487	100				82	0.059	0.832	100
	83	0.912	3.455				83	1.635	4.692				83	0.03	0.487				83	0.118	0.974	100			83	0.03	0.487	100				83	0.03	0.488	100
	84	0.412	2.142				84	6.837	9.847				84	0.266	1.661				84	0.03	0.487	100			84	0.178	1.662	100				84	0.03	0.488	100
	85	25.243	19.191				85	73.75	38.353				85	0.385	2.047				85	0.03	0.487	100			85	0.741	3.081	100				85	0.059	0.832	100
	86	0.177	1.556				86	0.059	0.832				86	3.995	12.233				86	0.326	2.636	100			86	0.03	0.487	100				86	0.03	0.488	100
	87	51.281	28.017				87	0.684	2.884				87	0.03	0.487				87	0.059	0.73	100			87	0.059	0.73	100				87	0.059	0.832	100
	88	2.059	5.212				88	0.03	0.488				88	0.473	2.391				88	0.533	2.535	100			88	0.03	0.487	100				88	0.03	0.488	100
	89	1.736	5.655				89	0.595	3.33				89	25.684	24.413				89	0.415	2.636	100			89	0.03	0.487	100				89	0.059	0.731	100
	90	0.118	0.97				90	0.268	1.909				90	7.25	14.12				90	0.148	1.217	100			90	1.007	3.912	100				90	0.03	0.488	100
	91	2.736	6.082				91	0.416	2.194				91	0.059	0.831				91	0.03	0.487	100			91	1.718	5.473	100				91	0.03	0.488	100
	92	0.382	2.041				92	0.089	0.975				92	2.042	5.369				92	0.089	0.974	100			92	0.178	1.662	100				92	0.03	0.488	100
	93	0.588	2.627				93	110.907	58.796				93	0.917	3.951				93	0.267	1.662	100			93	0.089	0.974	100				93	0.059	0.832	100
	94	1.265	3.898				94	13.496	13.967				94	0.178	1.317				94	0.03	0.487	100			94	0.03	0.487	100				94	0.119	1.564	100
	95	0.912	3.313				95	1.011	3.616				95	0.03	0.487				95	0.355	2.149	100			95	0.148	1.318	100				95	0.03	0.488	100
	96	2.413	5.697				96	0.059	0.731				96	0.089	0.973				96	0.118	0.974	100			96	1.007	4.357	100				96	0.178	1.808	100
	97	0.059	0.828				97	330.374	107.028				97	0.03	0.487				97	0.03	0.487	100			97	0.089	0.974	100				97	0.03	0.488	100
	98	0.53	2.485				98	1.635	4.507				98	0.059	0.973				98	0.296	1.906	100			98	0.03	0.487	100				98	0.119	1.564	100
	99	4.148	7.696				99	0.357	2.01				99	0.089	1.175				99	0.118	0.974	100			99	0.207	1.561	100				99	0.03	0.488	100
	100	0.118	0.97				100	1.011	3.616				100	5.681	9.38				100	0.059	0.831	100			100	0.089	1.074	100				100	0.178	1.463	100
	101	0.588	2.668				101	16.23	15.758				101	0.059	0.73				101	0.118	0.974	100			101	0.918	3.71	100				101	0.03	0.488	100
	102	4.148	7.353				102	1.219	3.96				102	1166.5	488.881				102	0.059	0.73	100			102	1.659	5.23	100				102	0.059	0.832	100
	103	1.883	4.969				103	0.505	2.539				103	20.979	22.123				103	7.051	14.615	100			103	0.089	0.974	100				103	0.059	0.731	100
	104	0.912	3.413				104	0.862	3.372				104	0.769	3.02				104	2.133	6.548	100			104	0.207	1.46	100				104	0.03	0.488	100
	105	0.206	1.556				105	7.461	10.234				105	2.278	6.686				105	26.158	34.922	100			105	0.059	0.73	100				105	0.089	0.975	100
	106	11.062	16.079				106	0.089	0.975				106	0.118	0.973				106	0.444	2.636	100			106	0.652	2.837	100				106	0.03	0.488	100
	107	0.294	1.941				107	0.03	0.488				107	84.687	76.858				107	0.355	2.149	100			107	0.03	0.487	100				107	0.03	0.488	100
	108	26.891	19.492				108	15.814	19.248				108	0.059	0.831				108	0.059	0.73	100			108	1.837	5.557	100				108	1.576	5.524	100
	109	1.059	3.697				109	0.208	1.564				109	6.51	12.257				109	56.108	66.853	100			109	0.059	0.831	100				109	0.446	2.842	100
	110	0.412	2.284				110	208.111	118.665				110	30.3	27.77				110	0.03	0.487	100			110	0.059	0.73	100
	111	0.441	2.242				111	0.416	2.153				111	14.44	15.378				111	0.03	0.487	100			111	2.074	5.96	100
	112	2.001	5.111				112	7.104	10.032				112	1.154	3.809				112	0.296	1.805	100			112	0.03	0.487	100
	113	5.237	11.127				113	2.111	7.778				113	0.089	1.074				113	0.237	1.561	100			113	0.03	0.487	100
	114	0.029	0.485				114	0.565	2.598				114	0.414	2.248				114	0.059	0.73	100			114	0.563	2.636	100
	115	0.206	1.556				115	8.115	10.335				115	1.953	4.983				115	0.622	2.837	100			115	0.059	0.831	100
	116	0.029	0.485				116	0.089	0.975				116	38.112	38.418				116	0.474	2.292	100			116	9.183	13.742	100
	117	0.059	0.828				117	0.773	3.229				117	2.989	6.989				117	0.03	0.487	100			117	0.592	3.123	100
	118	3.148	7.294				118	2.883	6.071				118	0.059	0.73				118	0.178	1.561	100			118	0.385	2.048	100
	119	0.471	2.384				119	0.743	3.027				119	0.562	2.634				119	5.184	12.08	100			119	17.656	23.21	100
	120	0.412	2.284				120	16.29	18.719				120	1.272	3.951				120	1.54	4.541	100			120	0.118	1.318	100
	121	0.471	3.07				121	1.367	4.305				121	1.716	5.814				121	0.741	3.71	100			121	0.03	0.487	100
	122	3.295	6.567				122	0.624	2.64				122	0.148	1.661				122	0.148	1.318	100			122	2.488	7.521	100
	123	0.677	2.828				123	0.922	3.473				123	0.74	4.556				123	14.901	18.812	100			123	0.03	0.487	100
	124	0.618	2.727				124	0.624	2.741				124	117.858	80.708				124	0.148	1.318	100			124	0.059	0.73	100
	125	0.912	3.555				125	26.724	21.502				125	0.118	1.317				125	0.059	0.974	100			125	0.237	1.805	100
	126	0.265	1.656				126	0.208	1.463				126	5.504	9.64				126	1.422	5.431	100			126	0.03	0.487	100
	127	0.235	2.041				127	0.981	3.473				127	43.468	29.348				127	0.918	3.568	100			127	0.03	0.487	100
	128	0.677	2.869				128	5.113	8.325				128	6.983	12.803				128	1.689	5.272	100			128	0.059	0.73	100
	129	0.647	2.828				129	0.476	2.438				129	2.515	6.2				129	2.874	10.258	100			129	0.533	2.493	100
	130	5.737	11.151				130	248.925	121.36				130	6.451	9.724				130	0.03	0.487	100			130	0.03	0.487	100
	131	10.827	15.895				131	21.195	18.499				131	3.018	6.645				131	0.118	0.974	100			131	0.089	0.974	100
	132	2.059	5.312				132	0.446	2.254				132	0.207	1.804				132	0.03	0.487	100			132	0.118	1.318	100
	133	0.265	1.799				133	0.089	0.975				133	0.03	0.487				133	0.296	2.048	100			133	0.77	3.609	100
	134	0.412	2.142				134	3.835	7.005				134	0.651	2.878				134	1.689	5.758	100			134	0.474	2.737	100
	135	0.941	3.555				135	3.775	7.147				135	1.687	5.47				135	0.089	0.974	100			135	0.148	1.318	100
	136	2.648	6.709				136	0.178	1.463				136	4.498	9.665				136	0.118	0.974	100			136	0.03	0.487	100
	137	0.324	1.899				137	1.011	3.616				137	0.71	3.322				137	0.03	0.487	100			137	1.007	4.399	100
	138	1.147	3.798				138	0.089	0.975				138	6.362	10.453				138	0.089	0.974	100			138	0.03	0.487	100
	139	6.62	13.334				139	4.072	7.492				139	0.03	0.487				139	0.03	0.487	100			139	0.03	0.487	100
	140	0.706	2.869				140	0.268	1.665				140	3.492	7.962				140	0.118	0.974	100			140	0.03	0.487	100
	141	0.706	2.97				141	0.089	0.975				141	0.237	1.904				141	1.037	3.912	100			141	0.03	0.487	100
	142	4.501	7.838				142	1.813	4.894				142	0.533	2.492				142	0.207	1.561	100			142	0.118	0.974	100
	143	0.029	0.485				143	0.327	1.909				143	2.278	5.47				143	0.03	0.487	100			143	0.03	0.487	100
	144	0.118	0.97				144	2.17	5.281				144	0.976	3.851				144	0.03	0.487	100			144	0.03	0.487	100
	145	0.206	1.455				145	2.408	5.524				145	0.118	1.317				145	272.188	159.83	100			145	0.178	1.318	100
	146	0.677	2.869				146	2.021	5.18				146	0.296	1.804				146	0.178	1.318	100			146	0.207	1.561	100
	147	2.618	8.583				147	1.338	4.103				147	0.03	0.487				147	0.03	0.487	100			147	0.8	3.123	100
	148	36.894	23.474				148	0.268	1.808				148	7.457	12.886				148	0.03	0.487	100			148	0.03	0.487	100
	149	39.542	27.324				149	0.059	0.832				149	0.947	3.465				149	3.644	7.681	100			149	0.03	0.487	100
	150	0.088	0.97				150	0.03	0.488				150	19.174	21.386				150	0.03	0.487	100			150	0.03	0.487	100
	151	0.029	0.485				151	0.327	1.909				151	86.374	72.57				151	3.703	8.714	100			151	0.03	0.487	100
	152	4.884	8.039				152	5.053	8.973				152	57.375	50.776				152	31.105	35.148	100			152	1.185	5.271	100
	153	0.765	3.011				153	0.684	2.985				153	0.917	3.465				153	0.296	1.947	100			153	0.059	0.73	100
	154	0.177	1.455				154	0.03	0.488				154	0.059	0.831				154	0.8	3.467	100			154	0.03	0.487	100
	155	0.147	1.313				155	1.992	6.357				155	0.207	1.56				155	0.148	1.318	100			155	0.741	3.223	100
	156	7.238	10.139				156	60.076	33.602				156	0.03	0.487				156	0.089	0.974	100			156	3.022	8.151	100
	157	0.177	1.455				157	1.605	4.549				157	0.266	1.946				157	0.355	2.636	100			157	7.495	14.757	100
	158	0.059	0.728				158	3.924	7.248				158	19.707	23.458				158	0.03	0.487	100			158	0.03	0.487	100
	159	1.795	4.768				159	0.684	3.96				159	4.143	8.792				159	0.089	0.974	100			159	0.03	0.487	100
	160	1.383	4.283				160	0.446	2.295				160	1.983	5.126				160	1.896	5.515	100			160	0.77	2.98	100
	161	0.029	0.485				161	0.951	3.473				161	0.562	3.322				161	147.203	103.336	100			161	0.711	2.921	100
	162	0.177	1.313				162	1.427	4.162				162	0.296	1.804				162	0.207	1.662	100			162	0.03	0.487	100
	163	1.5	4.425				163	0.059	0.731				163	4.379	8.893				163	0.148	1.46	100			163	0.03	0.487	100
	164	0.029	0.485				164	0.238	1.564				164	0.207	1.56				164	0.415	2.191	100			164	0.118	1.561	100
	165	1.206	3.999				165	0.178	1.32				165	0.118	1.317				165	0.178	1.805	100			165	0.237	1.805	100
	166	0.088	0.97				166	1.784	4.751				166	31.01	31.645				166	0.03	0.487	100			166	0.237	1.805	100
	167	0.412	2.284				167	496.393	262.889				167	0.03	0.487				167	53.65	38.069	100			167	0.03	0.487	100
	168	5.237	8.383				168	0.476	2.295				168	0.207	1.46				168	52.168	40.923	100			168	0.059	0.831	100
	169	1.442	4.81				169	1.546	4.406				169	0.266	1.661				169	1.066	3.995	100			169	0.8	3.223	100
	170	0.324	2.041				170	0.654	3.515				170	0.089	1.216				170	0.148	1.46	100			170	0.03	0.487	100
	171	0.706	3.313				171	0.981	3.515				171	0.888	7.652				171	0.829	4.44	100			171	0.089	0.974	100
	172	0.706	2.97				172	16.855	14.943				172	0.829	3.121				172	18.426	28.44	100			172	0.178	1.318	100
	173	0.471	2.343				173	1.605	4.448				173	0.651	2.735				173	0.03	0.487	100			173	0.03	0.487	100
	174	1.059	3.597				174	0.238	1.808				174	0.533	3.18				174	0.03	0.487	100			174	0.089	0.974	100
	175	0.324	1.899				175	0.832	3.229				175	74.774	73.476				175	0.296	2.048	100			175	0.089	0.974	100
	176	1.118	3.697				176	2.081	5.138				176	1.332	3.951				176	0.03	0.487	100			176	0.03	0.487	100
	177	0.029	0.485				177	295.119	114.109				177	16.63	17.435				177	0.059	0.831	100			177	0.592	3.668	100
	178	1.883	5.111				178	1.605	4.507				178	10.238	13.046				178	0.148	1.906	100			178	0.03	0.487	100
	179	16.594	20.462				179	0.981	3.473				179	1.243	4.396				179	0.03	0.487	100			179	0.237	1.906	100
	180	3.236	6.626				180	0.297	1.808				180	0.237	1.56				180	0.148	1.217	100			180	0.059	0.73	100
	181	0.147	1.313				181	3.3	6.517				181	0.03	0.487				181	0.118	0.974	100			181	0.03	0.487	100
	182	0.559	2.526				182	0.386	2.052				182	0.03	0.487				182	0.03	0.487	100			182	0.03	0.487	100
	183	93.854	60.442				183	1.546	4.406				183	5.681	11.082				183	0.444	2.392	100			183	0.03	0.487	100
	184	0.088	0.97				184	8.323	11.066				184	9.558	15.034				184	21.596	24.302	100			184	0.237	1.561	100
	185	0.206	1.556				185	0.892	3.372				185	0.148	1.317				185	0.089	0.974	100			185	0.03	0.487	100
	186	64.933	48.705				186	0.178	1.32				186	0.533	4.58				186	0.77	3.568	100			186	0.267	2.149	100
	187	3.884	7.897				187	0.268	1.707				187	5.474	11.267				187	0.059	0.73	100			187	0.03	0.487	100
	188	2.471	6.04				188	0.951	3.473				188	4.024	7.861				188	130.495	103.739	100			188	0.207	1.662	100
	189	0.53	2.526				189	0.268	1.665				189	0.118	0.973				189	0.03	0.487	100			189	0.059	0.73	100
	190	2.059	5.454				190	0.149	1.219				190	0.178	1.56				190	0.118	1.217	100			190	0.089	0.974	100
	191	0.118	0.97				191	8.71	10.923				191	34.591	39.44				191	25.655	23.916	100			191	0.03	0.487	100
	192	0.029	0.485				192	0.178	1.463				192	55.925	53.484				192	0.267	1.662	100			192	0.237	1.561	100
	193	2.001	5.111				193	1.665	4.65				193	0.03	0.487				193	0.059	0.831	100			193	0.326	2.778	100
	194	19.653	24.804				194	0.327	1.909				194	9.025	11.871				194	0.03	0.487	100			194	0.622	3.265	100
	195	0.971	4.041				195	0.059	0.731				195	0.266	1.703				195	51.398	46.598	100			195	0.03	0.487	100
	196	5.414	8.809				196	1.278	3.919				196	27.105	24.858				196	6.636	10.418	100			196	0.03	0.487	100
	197	1.5	4.484				197	41.527	24.891				197	91.611	72.84				197	0.178	1.662	100			197	22.129	21.548	100
	198	8.915	11.068				198	3.27	6.517				198	41.84	37.56				198	0.03	0.487	100			198	0.03	0.487	100
	199	12.857	15.736				199	1.397	4.204				199	0.592	3.263				199	0.059	0.73	100			199	0.03	0.487	100
	200	0.853	3.354				200	30.172	21.376				200	1.42	5.873				200	28.795	33.294	100			200	0.089	0.974	100
	201	1.059	3.555				201	1.754	4.751				201	1.361	4.438				201	0.089	0.974	100			201	0.03	0.487	100
	202	0.177	1.313				202	0.178	1.463				202	0.059	0.73				202	0.355	2.292	100			202	0.059	0.73	100
	203	14.387	14.138				203	2.378	5.483				203	3.373	9.665				203	0.296	1.947	100			203	0.059	0.831	100
	204	0.088	0.97				204	7.758	10.335				204	3.995	9.439				204	14.694	19.677	100			204	0.326	1.947	100
	205	0.912	3.313				205	1.011	3.473				205	0.059	0.831				205	1.866	6.322	100			205	0.355	2.636	100
	206	203.86	210.331				206	1.635	4.507				206	1.006	3.465				206	0.474	3.912	100			206	0.8	3.568	100
	207	3.795	7.838				207	0.624	2.741				207	36.929	30.068				207	0.03	0.487	100			207	0.059	0.831	100
	208	0.147	1.213				208	0.416	2.295				208	0.059	0.73				208	0.207	2.451	100			208	0.03	0.487	100
	209	1.03	3.798				209	0.624	2.985				209	0.03	0.487										209	0.059	0.831	100
	210	2.442	5.596				210	0.059	0.975				210	6.865	16										210	0.089	0.974	100
	211	0.206	1.556				211	2.616	5.786				211	0.533	2.592										211	0.059	0.831	100
	212	1.883	4.869				212	0.386	2.052				212	0.444	2.29										212	0.03	0.487	100
	213	2.001	4.969				213	0.476	2.783				213	3.788	8.692										213	0.03	0.487	100
	214	0.471	2.627				214	0.297	2.052				214	0.325	3.222										214	0.118	1.318	100
	215	15.976	16.682				215	0.773	2.985				215	0.178	1.46										215	0.03	0.487	100
	216	0.588	2.769				216	0.268	1.665				216	0.118	1.317										216	0.237	2.006	100
	217	0.265	1.941				217	1.427	4.204				217	2.219	5.957										217	2.133	5.473	100
	218	2.001	5.07				218	28.21	20.728				218	0.266	1.804										218	18.219	17.755	100
	219	0.559	2.627				219	1.04	3.574				219	0.148	1.317										219	0.355	2.535	100
	220	0.118	0.97				220	0.535	2.497				220	378.991	173.652										220	1.896	5.07	100
	221	0.029	0.485				221	2.081	5.483				221	0.592	2.735										221	0.03	0.487	100
	222	0.971	3.555				222	2.824	6.113				222	16.423	21.126										222	0.059	0.974	100
	223	7.296	9.938				223	18.579	16.347				223	0.592	2.777										223	0.03	0.487	100
	224	0.235	1.556				224	1.992	4.995				224	42.965	45.598										224	0.178	1.318	100
	225	0.941	3.354				225	0.416	2.295				225	6.48	11.545										225	3.17	6.69	100
	226	0.235	1.799				226	2.616	5.827				226	2.19	5.654										226	0.622	2.98	100
	227	0.029	0.485				227	0.059	0.832				227	0.237	1.703										227	0.118	0.974	100
	228	0.206	1.556				228	18.698	16.263				228	1.391	4.983										228	4.325	10.644	100
	229	0.059	0.828				229	0.238	1.564				229	9.883	11.972										229	0.148	1.318	100
	230	0.294	1.899				230	45.451	28.607				230	0.03	0.487										230	0.03	0.487	100
	231	0.324	1.899				231	0.386	2.295				231	2.397	5.672										231	0.089	0.974	100
	232	655.271	176.584				232	4.816	7.837				232	0.03	0.487										232	0.03	0.487	100
	233	1.147	3.697				233	2.289	5.726				233	7.309	11.771										233	0.089	0.974	100
	234	0.912	3.497				234	1.189	3.818				234	0.148	1.317										234	0.03	0.487	100
	235	1.412	4.183				235	8.858	10.923				235	1.243	3.951										235	0.03	0.487	100
	236	0.382	2.769				236	1.011	3.473				236	0.03	0.487										236	0.059	0.831	100
	237	0.441	2.284				237	0.386	2.052				237	0.03	0.487										237	0.059	0.73	100
	238	0.265	1.799				238	0.386	2.295				238	10.475	12.156										238	0.118	0.974	100
	239	0.118	0.97				239	15.933	14.985				239	0.03	0.487										239	0.089	0.974	100
	240	0.441	2.284				240	1.338	4.162				240	3.728	8.834										240	0.03	0.487	100
	241	0.736	3.07				241	19.054	16.019				241	6.421	10.21										241	3.762	10.442	100
	242	3.177	6.525				242	0.297	1.909				242	11.659	17.199										242	0.059	0.831	100
	243	1.442	4.183				243	4.221	7.593				243	0.917	3.465										243	0.059	0.831	100
	244	1.824	4.869				244	27.288	19.938				244	13.375	15.579										244	0.978	5.07	100
	245	1.059	3.697				245	1.011	3.574				245	6.155	13.063										245	0.089	0.974	100
	246	553.326	207.587				246	1.546	4.448				246	14.026	16.243										246	0.978	3.609	100
	247	2.03	5.111				247	0.773	4.222				247	0.03	0.487										247	0.089	0.974	100
	248	0.588	2.869				248	0.386	2.052				248	11.747	23.45										248	0.03	0.487	100
	249	3.648	7.211				249	0.178	1.32				249	3.403	6.888										249	2.34	7.135	100
	250	4.443	7.939				250	3.3	6.66				250	0.917	3.465										250	0.207	1.805	100
	251	0.324	1.899				251	0.713	2.884				251	0.03	0.487										251	0.089	1.074	100
	252	0.206	1.556				252	59.511	51.555				252	0.207	1.661										252	0.504	2.778	100
	253	0.588	2.727				253	0.059	0.832				253	0.03	0.487										253	0.03	0.487	100
	254	481.979	264.952				254	4.697	7.98				254	0.03	0.487										254	0.03	0.487	100
	255	0.265	1.799				255	0.149	1.463				255	0.71	3.868										255	0.118	0.974	100
	256	0.559	2.727				256	0.595	2.64				256	0.03	0.487										256	0.03	0.487	100
	257	1.53	4.283				257	3.656	7.005																257	0.03	0.487	100
	258	0.941	3.94				258	5.559	10.234																258	0.059	0.974	100
	259	3.413	6.91				259	2.556	5.869																259	0.889	3.467	100
	260	0.265	1.698				260	0.565	2.64																260	0.03	0.487	100
	261	0.647	2.727				261	0.119	1.219																261	0.03	0.487	100
	262	0.265	1.941				262	0.03	0.488																262	0.03	0.487	100
	263	0.941	3.455				263	0.208	1.463																263	0.178	1.46	100
	264	5.296	18.272				264	0.149	1.32																264	1.511	7.076	100
	265	3.325	6.768				265	2.17	5.239																265	0.77	3.954	100
	266	0.971	3.455				266	5.856	8.913																266	0.622	2.778	100
	267	0.794	3.112				267	4.845	7.98																267	0.03	0.487	100
	268	0.5	2.526				268	207.725	89.42																268	0.178	1.318	100
	269	81.938	73.533				269	0.268	1.808																269	0.03	0.487	100
	270	0.118	0.97				270	38.168	24.142																270	0.059	0.73	100
	271	0.088	1.071				271	11.236	13.563																271	0.089	1.175	100
	272	0.118	1.213				272	1.457	4.263																272	0.03	0.487	100
	273	93.854	46.338				273	0.268	1.808																273	0.267	1.805	100
	274	10.474	31.773				274	1.011	3.515																274	0.059	0.831	100
	275	1.118	3.697				275	3.478	6.803																275	0.03	0.487	100
	276	1.706	4.768				276	0.327	1.909																276	0.089	1.175	100
	277	0.677	2.828				277	1.784	4.793																277	11.583	21.893	100
	278	0.029	0.485				278	0.357	2.01																278	0.03	0.487	100
	279	1.147	3.697				279	1.427	4.305																279	0.889	3.853	100
	280	0.324	2.041				280	0.446	2.295																280	0.03	0.487	100
	281	1.206	3.999				281	1.546	4.549																281	2.429	6.12	100
	282	1.559	4.384				282	1.516	4.305																282	0.118	0.974	100
	283	0.147	1.213				283	0.149	1.32																283	3.94	8.394	100
	284	6.59	9.311				284	0.951	3.717																284	0.03	0.487	100
	285	2.089	6.324				285	0.297	1.808																285	0.059	0.831	100
	286	0.412	2.485				286	8.947	11.024																286	0.296	2.636	100
	287	0.382	2.041				287	0.089	0.975																287	56.375	55.339	100
	288	0.382	2.041				288	2.17	5.382																288	0.059	0.831	100
	289	0.618	2.97				289	0.297	1.909																289	0.889	3.467	100
	290	2.854	6.283				290	9.126	13.135																290	0.03	0.487	100
	291	0.324	2.142				291	145.865	65.647																291	0.355	1.947	100
	292	0.265	1.899				292	71.966	33.358																292	0.059	0.831	100
	293	0.941	3.455				293	0.238	1.808																293	0.059	0.73	100
	294	0.088	0.97				294	173.867	82.576																294	0.03	0.487	100
	295	0.147	1.313				295	8.888	10.881																295	0.474	2.392	100
	296	0.971	3.413				296	0.416	2.153																296	3.288	8.227	100
	297	0.029	0.485				297	0.178	1.463																297	0.03	0.487	100
	298	0.353	1.941				298	2.378	6.862																298	0.03	0.487	100
	299	0.059	0.828				299	0.505	2.396																299	0.355	2.392	100
	300	0.883	3.94				300	0.565	2.64																300	0.03	0.487	100
	301	2.677	6.082				301	0.357	2.052
	302	0.324	1.941				302	0.565	2.64
	303	0.235	1.556				303	3.151	7.207
	304	4.178	9.394				304	0.386	2.052
	305	1.912	5.011				305	12.188	12.832
	306	0.677	2.869				306	3.418	7.248
	307	1.353	4.526				307	76.098	43.111
	308	0.353	1.941				308	18.192	16.103
	309	0.088	0.97				309	0.327	1.951
	310	0.059	0.728				310	1.04	3.574
	311	0.382	2.041				311	1.486	4.448
	312	0.088	0.97				312	0.03	0.488
	313	0.118	0.97				313	0.327	1.909
	314	0.794	5.295				314	0.059	0.832
	315	3.119	6.383				315	0.059	0.731
	316	17.8	15.978				316	0.535	2.497
	317	1.736	4.727				317	1.04	3.473
	318	0.177	1.455				318	0.565	2.598
	319	5.443	8.625				319	0.832	3.229
	320	0.118	0.97				320	5.826	9.746
	321	0.883	3.313				321	7.283	10.78
	322	10.268	12.038				322	4.964	10.091
	323	0.118	0.97				323	29.726	21.098
	324	0.883	3.212				324	5.499	9.418
	325	4.001	7.17				325	0.595	2.64
	326	2.295	5.596				326	0.208	1.564
	327	0.206	1.556				327	0.089	0.975
	328	0.588	2.727				328	0.386	2.052
	329	0.029	0.485				329	8.829	11.066
	330	0.382	2.041				330	0.446	2.295
	331	1.53	4.425				331	1.605	4.448
	332	2.501	5.898				332	0.149	1.32
	333	0.294	1.899				333	0.684	2.884
	334	0.853	3.212				334	5.856	8.812
	335	6.679	18.12				335	0.178	1.32
	336	1.177	3.84				336	0.208	1.564
	337	0.412	2.142				337	5.44	12.428
	338	0.029	0.485				338	0.178	1.463
	339	0.147	1.313				339	176.869	75.292
	340	0.029	0.485				340	1.189	3.818
	341	1.589	4.526				341	0.416	2.153
	342	0.353	2.041				342	1.635	4.591
	343	0.029	0.485				343	4.964	8.081
	344	0.059	0.828				344	4.399	7.879
	345	0.029	0.485				345	0.03	0.488
	346	0.559	2.627				346	31.242	20.972
	347	196.093	60.743				347	0.773	3.027
	348	1.059	3.84				348	51.812	26.799
	349	1.206	4.041				349	0.149	1.32
	350	4.266	7.454				350	0.03	0.488
	351	2.383	5.496				351	0.357	2.01
	352	2.677	5.797				352	2.259	5.483
	353	0.029	0.485				353	0.297	1.951
	354	20.036	16.706				354	0.327	1.909
	355	0.412	2.142				355	1.07	3.616
	356	0.118	0.97				356	1.04	3.616
	357	0.059	0.828				357	0.178	1.32
	358	1.118	3.697				358	0.862	3.758
	359	0.059	0.828				359	0.327	1.909
	360	0.059	0.828				360	0.595	3.717
	361	0.147	1.313				361	0.476	2.396
	362	1.206	4.082				362	0.059	0.832
	363	0.441	2.284				363	31.242	26.538
	364	51.105	27.105				364	0.03	0.488
	365	0.029	0.485				365	3.24	6.458
	366	0.265	1.799				366	0.268	1.665
	367	1.383	4.041				367	0.059	0.832
	368	0.588	2.526				368	1.04	3.574
	369	1.324	4.183				369	0.149	1.219
	370	0.824	4.041				370	7.223	11.024
	371	0.235	1.556				371	2.378	5.483
	372	0.059	0.728				372	1.219	3.919
	373	0.971	3.455				373	2.438	5.524
	374	439.26	308.708				374	1.338	4.204
	375	0.029	0.485				375	0.149	1.32
	376	4.825	8.081				376	203.92	66.894
	377	0.059	0.828				377	0.089	0.975
	378	0.441	2.242				378	0.684	2.884
	379	9.327	11.21				379	8.858	11.024
	380	0.029	0.485				380	0.416	2.295
	381	0.029	0.485				381	1.338	4.204
	382	2.972	6.182				382	74.909	46.904
	383	0.029	0.485				383	1.338	4.162
	384	2.118	5.212				384	0.089	0.975
	385	1.648	4.969				385	4.281	9.77
	386	28.274	21.232				386	2.229	5.685
	387	1.295	4.141				387	163.255	74.746
	388	0.059	0.728				388	301.242	127.327
	389	0.736	2.97				389	0.386	2.052
	390	0.441	2.284				390	1.13	3.717
	391	0.824	3.212				391	0.03	0.488
	392	429.816	148.373				392	0.595	2.783
	393	0.412	2.142				393	0.03	0.488
	394	0.441	2.284				394	0.03	0.488
	395	0.353	1.941				395	0.03	0.488
	396	0.441	2.284				396	2.616	5.726
	397	1.383	5.253				397	4.697	9.847
	398	1.412	4.241				398	0.416	2.153
	399	0.912	3.497				399	1.486	4.305
	400	1.854	4.869				400	0.386	2.153
	401	0.618	2.627				401	1.516	4.406
	402	0.971	3.455				402	1.04	3.574
	403	0.618	2.627				403	0.297	1.808
	404	0.029	0.485				404	0.178	1.564
	405	0.147	1.455				405	0.03	0.488
	406	0.088	0.97				406	0.03	0.488
	407	0.059	0.728				407	99.463	44.644
	408	0.235	1.556				408	51.723	35.445
	409	18.124	16.321				409	4.816	8.081
	410	0.235	1.556				410	1.992	5.423
	411	0.118	0.97				411	3.478	6.904
	412	0.883	3.212				412	1.397	4.347
	413	6.473	9.353				413	1.159	3.717
	414	0.706	3.011				414	1.248	4.061
	415	0.588	2.769				415	0.743	3.027
	416	142.899	77.251				416	2.081	5.037
	417	1.795	4.768				417	1.784	4.793
	418	0.059	0.728				418	57.49	32.829
	419	2.736	6.04				419	5.083	8.123
	420	29.068	20.32				420	2.824	5.97
	421	0.088	0.97				421	0.386	2.295
	422	10.209	14.523				422	2.438	6.559
	423	4.737	9.595				423	3.002	6.315
	424	1.265	4.041				424	2.467	5.625
	425	0.941	3.455				425	23.097	20.366
	426	1.677	4.869				426	1.189	3.818
	427	0.029	0.485				427	1.367	4.263
	428	0.588	2.627				428	0.03	0.488
	429	0.147	1.313				429	0.951	3.616
	430	0.147	1.313				430	150.264	73.122
	431	0.029	0.485				431	0.03	0.488
	432	51.723	33.974				432	0.416	2.295
	433	0.824	3.212				433	0.059	0.731
	434	0.883	4.283				434	0.268	1.665
	435	0.088	0.97				435	2.021	5.096
	436	0.029	0.485				436	19.292	18.475
	437	3.942	7.596				437	1.011	3.574
	438	9.209	11.21				438	0.268	1.665
	439	0.294	1.899				439	1.011	3.616
	440	0.412	2.284				440	0.654	2.741
	441	0.118	0.97				441	15.993	15.27
	442	0.736	4.141				442	1.338	4.793
	443	0.088	1.213				443	0.059	0.975
	444	57.725	33.17				444	1.219	3.919
	445	0.412	2.384				445	0.624	2.741
	446	0.177	1.313				446	0.713	2.985
	447	0.059	0.828				447	0.357	2.052
	448	8.032	12.364				448	0.119	0.975
	449	0.088	0.97				449	0.119	0.975
	450	0.471	2.284				450	0.654	2.741
	451	0.382	2.041				451	219.912	98.577
	452	1.442	4.283				452	0.624	2.783
	453	2.972	6.283				453	0.803	3.086
	454	0.088	0.97				454	0.03	0.488
	455	0.029	0.485				455	5.886	9.199
	456	85.969	42.297				456	0.208	1.564
	457	0.059	0.728				457	82.37	39.673
	458	1.089	3.697				458	11.504	12.386
	459	0.618	2.627				459	59.719	30.878
	460	0.5	2.485				460	0.03	0.488
	461	0.53	2.526				461	0.416	2.153
	462	0.618	2.727				462	0.03	0.488
	463	2.118	5.212				463	51.961	53.727
	464	0.324	2.142				464	0.773	2.985
	465	0.382	2.041				465	1.13	3.717
	466	0.677	2.869				466	0.832	3.128
	467	1.971	5.111				467	0.238	1.564
	468	1.265	3.94				468	2.765	6.214
	469	3.119	7.939				469	0.208	1.463
	470	0.382	2.041				470	0.268	1.808
	471	0.294	1.899				471	0.892	3.33
	472	0.118	0.97				472	0.892	4.061
	473	4.59	15.5				473	2.497	5.685
	474	1.53	4.384				474	0.238	1.808
	475	2.766	6.626				475	6.332	9.359
	476	0.794	3.455				476	0.03	0.488
	477	1.795	4.827				477	1.189	3.818
	478	0.177	1.455				478	0.03	0.488
	479	5.678	8.767				479	3.508	6.761
	480	1.089	3.84				480	0.327	2.194
	481	0.177	1.313				481	2.556	5.768
	482	1	3.697				482	3.002	6.458
	483	0.118	0.97				483	0.654	2.783
	484	0.147	1.213				484	0.208	1.564
	485	2.148	5.212				485	3.864	7.248
	486	3.707	7.211				486	1.13	3.717
	487	0.382	2.142				487	1.189	3.717
	488	1.118	3.697				488	8.472	10.822
	489	0.088	0.97				489	0.119	1.32
	490	1.412	4.283				490	525.197	200.798
	491	7.002	11.494				491	22.8	18.214
	492	1.295	4.041				492	50.148	33.484
	493	0.235	1.698				493	62.097	33.762
	494	1.883	4.91				494	0.357	2.052
	495	4.06	7.596				495	2.021	5.138
	496	0.118	1.213				496	0.327	1.909
	497	0.706	2.97				497	296.545	108.048
	498	1	3.597				498	5.291	8.812
	499	0.941	3.497				499	14.001	16.59
	500	0.677	2.828				500	0.624	2.741
	501	1.5	4.283				501	163.284	97.947
	502	2.589	6.425				502	0.535	2.497
	503	2.707	5.898				503	1.07	4.263
	504	17.947	19.693				504	0.535	2.539
	505	0.971	3.413				505	0.149	1.32
	506	0.206	1.556				506	0.119	0.975
	507	0.794	3.555				507	0.119	1.219
	508	1.03	3.84				508	0.327	1.951
	509	0.647	2.727				509	94.944	47.2
	510	1.177	3.798				510	0.238	1.564
	511	0.794	3.07				511	2.051	5.037
	512	0.559	2.627				512	1.665	4.608
	513	1.03	3.656				513	15.428	14.581
	514	0.588	3.112				514	0.03	0.488
	515	32.511	24.621				515	1.04	3.574
	516	0.412	2.142				516	0.416	2.153
	517	103.739	48.143				517	0.059	0.731
	518	2.059	5.111				518	352.4	143.664
	519	15.564	28.845				519	1.516	4.305
	520	5.708	8.767				520	0.684	2.985
	521	0.029	0.485				521	1.605	4.692
	522	5.855	9.11				522	0.624	2.741
	523	1.265	4.082				523	0.238	1.808
	524	0.353	2.041				524	0.208	1.463
	525	147.459	83.933				525	24.643	22.905
	526	2.795	6.04				526	0.832	3.229
	527	0.029	0.485				527	4.102	7.736
	528	1.353	4.141				528	23.365	19.391
	529	1.471	4.342				529	5.915	9.645
	530	1.942	5.839				530	0.089	0.975
	531	1.118	3.697				531	0.268	1.808
	532	0.029	0.485				532	6.837	9.544
	533	1.059	3.697				533	0.535	2.539
	534	0.647	2.869				534	0.089	0.975
	535	0.971	4.384				535	0.268	1.665
	536	0.588	2.769				536	2.14	5.138
	537	0.471	2.384				537	2.527	5.768
	538	0.382	2.041				538	0.119	0.975
	539	1.883	4.869				539	7.372	9.931
	540	1.236	3.898				540	1.189	3.859
	541	1.059	3.597				541	1.07	3.96
	542	0.5	2.384				542	0.892	3.372
	543	0.088	0.97				543	0.059	0.832
	544	1.618	4.626				544	1.04	3.574
	545	2.854	7.069				545	0.089	0.975
	546	8.503	11.009				546	0.03	0.488
	547	0.235	1.556				547	2.378	5.483
	548	1.353	4.283				548	1.992	5.18
	549	1.089	3.697				549	0.03	0.488
	550	0.059	0.728				550	1.13	3.818
	551	0.029	0.485				551	4.994	9.056
	552	0.912	3.313				552	1.843	4.894
	553	0.324	2.041				553	0.476	2.355
	554	5.796	9.737				554	1.07	3.717
	555	0.147	1.313				555	0.416	2.396
	556	0.441	2.242				556	0.089	0.975
	557	0.059	0.97				557	1.219	4.002
	558	1.383	4.141				558	0.505	2.396
	559	0.5	3.313				559	0.268	1.951
	560	11.268	13.878				560	1.13	3.717
	561	0.736	2.869				561	0.03	0.488
	562	0.588	3.212				562	0.03	0.488
	563	11.857	14.748				563	0.119	0.975
	564	3.001	6.241				564	0.892	3.33
	565	0.618	2.869				565	3.508	6.803
	566	128.13	56.061				566	0.624	2.783
	567	0.029	0.485				567	0.743	3.086
	568	2.707	6.425				568	0.178	1.32
	569	0.294	1.799				569	5.588	9.157
	570	39.748	27.348				570	0.595	2.64
	571	0.441	2.242				571	0.595	2.64
	572	4.619	8.566				572	3.686	6.904
	573	2.413	5.555				573	1.873	4.894
	574	0.971	3.597				574	0.386	2.153
	575	0.177	1.656				575	14.328	16.751
	576	0.941	3.313				576	0.059	0.731
	577	0.588	3.07				577	1.516	4.406
	578	1.147	3.84				578	0.178	1.32
	579	3.737	7.111				579	11.058	12.344
	580	0.765	3.07				580	1.159	3.96
	581	0.5	2.384				581	3.508	6.803
	582	2.942	6.525				582	0.059	0.731
	583	0.324	1.941				583	4.251	12.714
	584	0.441	2.284				584	1.873	4.793
	585	1.648	4.585				585	66.645	44.71
	586	0.088	0.97				586	12.515	12.975
	587	4.384	7.981				587	191.554	76.766
	588	4.619	9.537				588	0.297	1.808
	589	0.059	0.728				589	0.981	3.473
	590	0.618	2.869				590	1.397	4.305
	591	0.412	2.242				591	3.121	6.82
	592	72.935	35.654				592	0.03	0.488
	593	1.118	3.697				593	1.635	4.549
	594	0.5	2.426				594	1.546	4.305
	595	0.294	2.041				595	14.12	15.573
	596	0.147	1.213				596	0.327	1.951
	597	0.53	2.668				597	0.297	1.909
	598	0.412	2.142				598	2.943	6.273
	599	1.353	4.283				599	2.705	5.928
	600	0.029	0.485				600	3.181	6.416
	601	0.088	0.97				601	1.308	4.204
	602	0.265	1.799				602	0.059	0.731
	603	2.795	6.04				603	0.476	2.355
	604	0.353	1.941				604	12.485	13.177
	605	6.296	9.211				605	2.616	5.726
	606	0.294	1.799				606	0.03	0.488
	607	0.294	1.899				607	1.754	4.692
	608	1.059	3.597				608	4.281	8.123
	609	0.029	0.485				609	0.922	3.372
	610	0.324	1.941				610	1.605	4.692
	611	0.206	1.556				611	14.566	15.472
	612	0.883	3.212				612	2.348	5.625
	613	0.147	1.313				613	0.119	1.32
	614	0.118	0.97				614	1.754	4.894
	615	0.029	0.485				615	0.654	2.741
	616	0.588	2.627				616	0.327	1.951
	617	21.566	31.08				617	1.278	4.061
	618	1.677	4.668				618	16.617	16.507
	619	0.265	1.656				619	0.178	2.212
	620	1.736	4.626				620	1.1	3.717
	621	0.206	1.556				621	218.396	93.945
	622	0.118	0.97				622	0.059	0.832
	623	1.383	4.484				623	0.03	0.488
	624	0.029	0.485				624	62.811	35.553
	625	0.382	2.041				625	2.051	5.239
	626	9.121	13.009				626	1.962	4.894
	627	1.147	3.898				627	0.059	0.832
	628	1.677	4.768				628	0.624	2.64
	629	147.165	124.843				629	0.832	3.33
	630	5.531	8.625				630	5.826	8.771
	631	8.356	10.767				631	0.446	2.254
	632	0.059	0.728				632	0.238	1.707
	633	0.265	1.656				633	1.219	3.919
	634	0.147	1.313				634	0.03	0.488
	635	0.441	2.627				635	96.936	46.156
	636	0.559	2.869				636	29.785	21.805
	637	0.059	0.828				637	0.357	2.052
	638	9.827	12.122				638	2.527	5.869
	639	2.707	5.839				639	9.156	11.899
	640	18.094	15.836				640	2.2	5.239
	641	7.591	10.323				641	14.328	14.884
	642	0.971	3.455				642	0.297	1.909
	643	82.232	75.443				643	0.565	2.64
	644	0.382	2.142				644	1.04	3.574
	645	0.412	2.142				645	1.754	4.894
	646	0.353	1.941				646	0.03	0.488
	647	0.029	0.485				647	0.208	1.564
	648	21.448	17.108				648	6.064	9.056
	649	0.559	2.627				649	9.274	11.31
	650	1.147	3.798				650	32.758	25.302
	651	0.294	1.799				651	131.923	84.679
	652	87.646	41.435				652	0.178	1.32
	653	2.089	5.413				653	0.951	3.431
	654	0.265	1.799				654	11.207	12.243
	655	0.206	1.556				655	0.059	0.832
	656	0.5	2.526				656	3.627	6.904
	657	167.937	90.96				657	3.181	6.559
	658	66.933	37.629				658	2.438	5.584
	659	0.059	0.728				659	3.27	6.559
	660	126.512	45.316				660	1.665	4.65
	661	0.029	0.485				661	1.516	4.448
	662	40.484	52.062				662	24.227	19.206
	663	2.589	5.839				663	14.685	14.842
	664	5.59	8.667				664	0.208	1.564
	665	7.591	10.281				665	38.168	30.903
	666	0.559	2.627				666	9.542	15.068
	667	0.088	0.97				667	2.289	5.483
	668	25.597	19.291				668	1.219	4.061
	669	1	3.455				669	1.902	5.037
	670	63.697	31.347				670	4.726	11.689
	671	2.854	8.282				671	4.191	7.45
	672	0.853	3.354				672	1.813	4.793
	673	0.118	0.97				673	10.374	12.874
	674	0.059	0.728				674	0.03	0.488
	675	0.647	2.97				675	0.119	0.975
	676	196.387	85.932				676	0.03	0.488
	677	0.029	0.485				677	0.981	3.473
	678	1.206	4.425				678	1.605	4.549
	679	0.471	2.284				679	1.605	4.65
	680	0.118	0.97				680	3.062	6.904
	681	3.03	6.14				681	1.992	5.037
	682	1.03	3.697				682	0.297	1.808
	683	0.324	1.899				683	6.569	9.3
	684	0.588	2.97				684	1.457	4.263
	685	1.236	5.153				685	1.575	4.608
	686	38.954	39.864				686	0.089	0.975
	687	0.147	1.455				687	1.635	4.507
	688	1.883	5.212				688	2.913	6.071
	689	18.977	17.049				689	0.089	0.975
	690	0.647	2.727				690	0.862	3.372
	691	0.324	2.041				691	13.823	14.11
	692	0.118	1.213				692	1.635	4.793
	693	0.177	1.455				693	0.595	2.64
	694	1	3.597				694	0.595	2.64
	695	8.414	13.334				695	5.47	8.569
	696	9.238	12.624				696	11.028	12.487
	697	0.088	0.97				697	0.089	0.975
	698	0.088	1.071				698	0.03	0.488
	699	1.206	3.94				699	0.535	2.539
	700	1.236	3.94				700	0.327	1.951
	701	0.412	2.142				701	3.062	6.416
	702	0.677	3.212				702	0.595	2.64
	703	0.147	1.313				703	0.268	2.355
	704	0.177	1.455				704	0.505	2.396
	705	2.413	5.454				705	7.283	9.847
	706	0.059	0.728				706	26.159	20.366
	707	2.736	8.667				707	1.486	4.305
	708	0.559	2.627				708	1.248	3.818
	709	0.118	0.97				709	0.476	2.396
	710	13.122	19.718				710	0.268	1.808
	711	0.147	1.455				711	0.03	0.488
	712	0.177	1.313				712	0.743	3.086
	713	0.441	2.242				713	0.505	2.539
	714	0.177	1.313				714	1.1	3.717
	715	10.974	12.624				715	15.041	16.893
	716	3.531	6.91				716	3.27	6.66
	717	1	3.656				717	528.437	183.281
	718	0.029	0.485				718	4.489	7.736
	719	2.677	6.809				719	5.41	8.325
	720	0.647	2.869				720	11.415	12.975
	721	3.03	6.341				721	9.869	13.219
	722	0.853	3.112				722	4.102	7.492
	723	1.795	5.011				723	0.178	1.32
	724	0.118	0.97				724	0.089	0.975
	725	4.09	7.696				725	0.119	0.975
	726	0.206	1.698				726	37.157	24.898
	727	0.559	2.526				727	15.844	17.726
	728	1.295	4.283				728	0.386	2.052
	729	0.794	3.212				729	16.557	15.228
	730	0.265	1.656				730	1.457	4.263
	731	0.294	1.799				731	6.242	9.115
	732	1.765	4.668				732	1.605	4.549
	733	14.328	26.184				733	0.089	0.975
	734	0.059	0.728				734	3.002	6.214
	735	1.383	5.111				735	1.07	3.675
	736	1.5	4.869				736	23.454	22.654
	737	51.34	50.981				737	2.378	5.726
	738	0.412	2.142				738	1.546	4.448
	739	0.294	1.799				739	2.556	5.97
	740	0.412	2.242				740	1.635	4.65
	741	0.382	2.142				741	12.544	14.783
	742	0.912	3.354				742	0.386	2.153
	743	0.235	1.556				743	14.833	14.598
	744	1.589	4.668				744	1.813	4.793
	745	0.765	3.07				745	0.297	1.808
	746	0.382	2.041				746	0.773	3.128
	747	0.118	1.313				747	1.367	4.204
	748	0.177	1.313				748	0.892	3.229
	749	0.53	2.485				749	2.794	6.559
	750	0.441	2.284				750	0.089	1.177
	751	1.559	4.626				751	0.386	2.052
	752	0.324	2.041				752	4.637	7.837
	753	0.265	1.656				753	53.031	29.238
	754	0.147	1.455				754	5.618	11.007
	755	2.942	6.14				755	1.1	3.859
	756	0.559	2.585				756	1.873	4.995
	757	0.029	0.485				757	3.27	6.559
	758	1.912	5.111				758	0.238	1.564
	759	1.089	3.597				759	1.665	4.507
	760	1.736	5.011				760	0.03	0.488
	761	0.736	3.84				761	0.059	0.731
	762	0.059	0.728				762	87.751	48.04
	763	0.794	3.112				763	8.799	11.024
	764	1.324	4.183				764	1.457	4.549
	765	0.147	1.313				765	2.438	5.524
	766	1.177	3.898				766	713.183	290.016
	767	0.265	1.656				767	0.654	2.842
	768	1	3.455				768	0.119	0.975
	769	2.03	6.525				769	2.497	5.625
	770	4.296	8.927				770	17.836	16.834
	771	0.147	1.455				771	5.38	9.241
	772	0.677	2.869				772	1.397	4.406
	773	4.296	7.998				773	4.251	7.492
	774	22.89	21.876				774	0.654	2.783
	775	0.618	2.627				775	1.07	3.675
	776	1.589	4.384				776	0.535	2.539
	777	0.059	0.828				777	0.03	0.488
	778	3.648	8.424				778	0.476	2.355
	779	0.265	1.799				779	1.873	6.517
	780	0.118	0.97				780	58.649	30.171
	781	0.294	1.941				781	0.119	0.975
	782	365.942	111.045				782	0.357	2.153
	783	0.53	2.485				783	0.951	3.33
	784	0.324	1.941				784	0.476	2.355
	785	0.471	2.343				785	1.902	4.995
	786	1.03	3.455				786	0.595	2.64
	787	0.029	0.485				787	1.546	4.305
	788	1.618	4.526				788	0.119	0.975
	789	0.029	0.485				789	0.624	2.926
	790	0.029	0.485				790	0.476	2.295
	791	2.265	5.354				791	0.832	3.128
	792	4.06	7.596				792	0.03	0.488
	793	5.914	9.152				793	0.119	1.219
	794	0.353	2.041				794	36.117	25.176
	795	206.331	86.109				795	1.902	4.793
	796	0.059	0.728				796	2.883	6.214
	797	0.471	2.284				797	0.059	0.731
	798	2.207	6.525				798	12.277	20.063
	799	1	3.555				799	3.151	6.559
	800	2.942	6.484				800	0.149	1.32
	801	1.03	3.614				801	0.862	3.818
	802	3.589	7.01				802	1.219	3.818
	803	0.853	3.313				803	52.972	33.282
	804	1.5	4.425				804	0.03	0.488
	805	0.618	2.627				805	1.278	4.751
	806	0.235	1.999				806	3.121	6.416
	807	1.589	4.526				807	0.059	0.731
	808	0.177	1.313				808	0.03	0.488
	809	1.706	4.526				809	2.616	5.827
	810	2.148	5.253				810	0.476	2.355
	811	2.148	8.625				811	1.813	4.995
	812	1.677	4.626				812	0.268	1.808
	813	1.118	3.697				813	5.202	8.468
	814	0.883	3.455				814	35.314	26.698
	815	0.441	2.384				815	0.357	2.052
	816	0.53	2.526				816	1.13	3.859
	817	20.154	29.649				817	4.221	7.391
	818	1	3.898				818	0.446	2.254
	819	2.177	5.354				819	31.926	24.327
	820	0.059	0.828				820	41.081	24.058
	821	0.765	3.07				821	0.624	2.783
	822	3.413	6.768				822	0.446	2.295
	823	1.383	4.141				823	0.03	0.488
	824	0.177	1.313				824	0.089	0.975
	825	0.618	2.769				825	1.843	4.995
	826	0.177	1.455				826	0.654	2.741
	827	88.735	49.851				827	0.089	0.975
	828	1.412	4.283				828	30.677	20.829
	829	11.71	12.524				829	1.932	4.936
	830	0.029	0.485				830	0.059	0.832
	831	4.237	7.755				831	2.021	5.096
	832	0.118	0.97				832	0.922	3.33
	833	0.706	2.869				833	0.327	1.909
	834	0.883	3.212				834	0.089	0.975
	835	2.501	6.082				835	0.119	0.975
	836	0.265	1.656				836	0.119	0.975
	837	0.382	2.526				837	1.219	3.96
	838	4.972	9.696				838	0.119	0.975
	839	0.5	2.426				839	4.637	7.938
	840	0.118	0.97				840	0.238	1.909
	841	0.059	0.828				841	5.202	8.854
	842	4.472	8.583				842	0.119	0.975
	843	0.53	2.526				843	3.775	7.147
	844	0.912	3.555				844	0.238	1.564
	845	0.206	1.455				845	0.535	2.539
	846	0.677	2.97				846	0.773	3.187
	847	0.059	0.728				847	273.657	122.82
	848	1.295	4.183				848	0.505	2.497
	849	8.856	13.31				849	0.505	2.396
	850	0.206	1.556				850	0.476	2.396
	851	0.265	1.941				851	24.435	19.063
	852	5.09	8.324				852	0.743	2.985
	853	12.475	19.801				853	0.089	0.975
	854	7.238	17.753				854	63.554	37.486
	855	1.089	4.969				855	1.694	4.894
	856	1.089	3.697				856	0.059	0.975
	857	0.736	2.869				857	0.089	0.975
	858	0.088	0.97				858	0.624	2.985
	859	1.5	4.425				859	11.92	15.716
	860	0.206	1.556				860	1483.77	627.539
	861	0.029	0.485				861	26.991	19.694
	862	2.442	5.898				862	0.119	0.975
	863	0.118	0.97				863	0.268	1.808
	864	0.765	3.212				864	0.713	2.926
	865	0.088	0.97				865	1.04	3.574
	866	0.059	0.728				866	0.832	3.33
	867	1.706	5.496				867	2.824	6.172
	868	28.862	23.006				868	0.386	2.052
	869	0.177	1.313				869	0.178	1.564
	870	1.059	3.555				870	1.724	4.608
	871	0.294	1.799				871	0.059	0.832
	872	17.859	16.741				872	0.446	2.254
	873	0.206	1.556				873	1.665	4.793
	874	0.029	0.485				874	0.922	3.431
	875	0.147	1.313				875	0.208	2.052
	876	0.441	2.284				876	0.238	1.564
	877	0.206	1.556				877	0.268	1.665
	878	1.442	4.183				878	0.624	2.64
	879	0.206	1.556				879	0.297	1.808
	880	4.766	7.939				880	1.1	3.616
	881	0.912	3.697				881	1.308	4.103
	882	1.559	4.768				882	0.327	2.052
	883	0.471	2.284				883	0.951	3.473
	884	0.088	0.97				884	0.238	1.564
	885	3.501	6.827				885	2.586	5.97
	886	43.279	25.449				886	3.686	6.803
	887	1.118	3.656				887	12.782	17.768
	888	1.059	3.597				888	18.579	19.492
	889	0.294	1.899				889	0.386	2.052
	890	5.002	8.324				890	0.922	3.271
	891	0.647	2.869				891	0.446	2.295
	892	0.441	2.284				892	0.357	1.951
	893	7.679	12.908				893	0.178	1.32
	894	0.088	0.97				894	2.527	5.726
	895	0.559	2.627				895	2.021	5.096
	896	1.824	4.869				896	0.951	3.473
	897	28.097	56.636				897	0.059	0.832
	898	0.059	0.728				898	142.09	66.194
	899	34.335	28.602				899	0.951	3.473
	900	1.206	4.041				900	0.713	3.128
	901	2.854	6.91				901	259.21	118.894
	902	0.029	0.485				902	0.684	2.884
	903	0.088	0.97				903	0.505	2.497
	904	0.53	2.485				904	1.338	4.061
	905	0.324	1.899				905	2.289	5.483
	906	0.765	2.97				906	4.697	8.569
	907	1.118	3.798				907	0.059	0.832
	908	0.706	3.011				908	0.119	0.975
	909	1.295	4.041				909	0.386	2.194
	910	0.471	2.384				910	0.03	0.488
	911	0.029	0.485				911	0.446	2.254
	912	8.297	11.595				912	6.421	9.83
	913	0.177	1.313				913	0.386	2.052
	914	0.294	1.899				914	0.119	0.975
	915	0.177	1.313				915	0.059	0.731
	916	0.294	1.899				916	0.922	3.473
	917	1.648	5.739				917	0.03	0.488
	918	1	3.555				918	62.187	35.065
	919	0.53	2.526				919	0.357	2.153
	920	0.177	1.313				920	7.729	10.822
	921	0.588	2.869				921	0.416	2.295
	922	0.177	1.556				922	0.386	2.153
	923	0.677	2.869				923	11.861	14.253
	924	3.266	7.696				924	0.03	0.488
	925	1.442	4.183				925	0.624	2.884
	926	0.412	2.142				926	4.221	7.534
	927	1.03	3.555				927	1.189	3.818
	928	0.059	0.828				928	672.191	341.016
	929	1.795	4.768				929	1.219	3.818
	930	0.706	3.011				930	1.754	4.751
	931	0.794	3.212				931	0.357	1.951
	932	1.089	3.555				932	0.119	0.975
	933	1.618	4.526				933	0.208	1.564
	934	0.5	2.384				934	0.565	2.539
	935	0.853	3.112				935	0.297	1.909
	936	1.059	3.697				936	0.178	1.32
	937	0.618	2.869				937	1.13	3.818
	938	0.324	2.041				938	0.059	0.731
	939	0.5	2.485				939	0.059	0.731
	940	0.177	1.455				940	1.308	4.204
	941	0.029	0.485				941	0.059	0.731
	942	0.471	2.284				942	2.943	14.852
	943	27.185	20.563				943	0.059	0.832
	944	4.443	8.039				944	7.015	10.032
	945	6.679	9.796				945	1.338	4.162
	946	0.088	0.97				946	1.1	3.675
	947	1.118	4.768				947	1.13	3.859
	948	2.883	6.283				948	2.497	5.726
	949	0.971	3.597				949	0.238	1.564
	950	0.177	1.313				950	0.03	0.488
	951	0.382	2.041				951	0.238	1.564
	952	0.736	3.07				952	0.595	2.64
	953	0.382	2.041				953	1.248	3.96
	954	0.177	1.313				954	0.624	2.64
	955	0.088	0.97				955	0.178	1.463
	956	0.618	2.727				956	0.951	3.473
	957	2.913	6.182				957	0.03	0.488
	958	0.5	2.526				958	0.238	1.564
	959	5.678	9.654				959	7.015	11.815
	960	0.353	2.041				960	0.119	0.975
	961	0.147	1.313				961	21.64	18.113
	962	1.53	4.425				962	0.624	2.64
	963	0.824	3.171				963	1.13	3.717
	964	0.029	0.485				964	0.03	0.488
	965	0.206	1.556				965	0.059	0.832
	966	0.177	1.313				966	12.634	13.421
	967	0.677	3.112				967	1.07	4.061
	968	615.434	167.02				968	1.278	4.305
	969	0.382	2.041				969	0.505	2.539
	970	0.53	2.727				970	19.203	20.593
	971	1.618	4.626				971	0.416	2.153
	972	0.588	2.769				972	0.892	3.229
	973	0.706	2.869				973	1.278	3.919
	974	0.412	2.142				974	32.49	22.501
	975	0.177	1.313				975	0.386	2.052
	976	6.061	11.051				976	0.149	1.32
	977	1.706	4.768				977	0.238	1.564
	978	0.53	2.526				978	0.238	1.564
	979	0.883	3.354				979	0.059	0.731
	980	0.706	2.869				980	1.219	3.919
	981	1.854	6.667				981	73.096	38.151
	982	5.708	8.625				982	1.011	6.761
	983	4.06	7.797				983	1.219	3.919
	984	0.382	2.142				984	1.754	4.692
	985	6.473	9.495				985	0.119	0.975
	986	4.119	7.454				986	0.03	0.488
	987	0.912	3.455				987	0.922	3.229
	988	0.059	0.728				988	1.219	3.919
	989	1.618	4.526				989	2.319	5.483
	990	1.942	5.212				990	0.713	2.884
	991	2.295	5.555				991	0.327	1.909
	992	7.091	10.281				992	0.03	0.488
	993	2.001	5.07				993	0.386	2.194
	994	0.412	2.183				994	1.457	6.214
	995	1.265	4.041				995	0.446	2.295
	996	1.795	4.727				996	0.119	0.975
	997	1.442	4.183				997	0.238	1.665
	998	1.883	4.869				998	2.17	5.97
	999	0.883	3.354				999	0.03	0.488
	1000	0.53	2.627				1000	0.268	1.808
	1001	0.559	2.627				1001	41.616	28.75
	1002	1.324	4.626				1002	0.535	2.539
	1003	14.328	16.321				1003	0.357	2.01
	1004	2.736	6.082				1004	0.178	1.32
	1005	1.353	4.526				1005	0.238	1.564
	1006	1.618	4.91				1006	0.03	0.488
	1007	4.59	7.797				1007	0.03	0.488
	1008	3.177	7.838				1008	5.797	8.913
	1009	0.088	0.97				1009	8.085	10.923
	1010	0.53	2.627				1010	1.219	5.928
	1011	4.325	7.596				1011	17.39	19.635
	1012	1.912	5.011				1012	0.03	0.488
	1013	0.147	1.313				1013	0.565	2.64
	1014	0.088	1.071				1014	2.229	5.239
	1015	0.059	0.728				1015	137.334	52.993
	1016	1.147	3.697				1016	0.297	2.052
	1017	1.589	4.626				1017	0.149	1.32
	1018	6.473	9.755				1018	42.776	26.211
	1019	11.062	22.93				1019	0.178	1.32
	1020	0.147	1.455				1020	2.467	5.726
	1021	0.177	1.313				1021	0.327	1.909
	1022	0.883	3.354				1022	0.297	1.909
	1023	1.03	3.739				1023	4.281	9.241
	1024	1.412	4.283				1024	0.654	2.741
	1025	0.647	2.869				1025	10.582	12.202
	1026	2.001	5.454				1026	0.565	2.64
	1027	0.647	2.727				1027	0.089	0.975
	1028	0.118	0.97				1028	0.981	3.616
	1029	0.53	2.526				1029	0.684	2.884
	1030	0.235	1.556				1030	0.951	3.372
	1031	0.206	1.556				1031	0.03	0.488
	1032	0.177	1.313				1032	0.476	2.396
	1033	1.736	4.869				1033	0.892	3.818
	1034	0.559	2.585				1034	0.119	1.32
	1035	0.853	4.668				1035	9.423	13.807
	1036	0.382	2.041				1036	0.832	3.128
	1037	0.912	3.354				1037	0.119	0.975
	1038	2.56	5.697				1038	0.089	0.975
	1039	3.413	6.626				1039	7.521	10.133
	1040	2.001	5.07				1040	1.992	4.995
	1041	1	4.141				1041	2.913	6.315
	1042	0.059	0.728				1042	0.178	1.463
	1043	1.03	3.656				1043	0.922	3.372
	1044	3.177	6.567				1044	0.178	1.463
	1045	0.883	3.354				1045	1.1	3.818
	1046	0.235	1.556				1046	0.327	1.909
	1047	1.324	5.697				1047	0.03	0.488
	1048	0.118	0.97				1048	217.92	80.214
	1049	1.03	4.041				1049	0.476	2.396
	1050	11.151	14.079				1050	0.357	2.052
	1051	8.973	11.553				1051	1.308	4.02
	1052	0.029	0.485				1052	0.03	0.488
	1053	0.706	2.97				1053	6.183	9.014
	1054	3.972	7.111				1054	3.032	6.315
	1055	0.177	1.455				1055	0.119	1.32
	1056	0.412	2.284				1056	0.119	0.975
	1057	0.088	0.97				1057	0.03	0.488
	1058	668.805	264.449				1058	28.388	24.107
	1059	3.766	7.27				1059	0.446	2.254
	1060	0.088	1.213				1060	0.297	1.909
	1061	1.883	4.928				1061	0.059	0.731
	1062	0.118	1.213				1062	0.059	0.731
	1063	2.854	6.241				1063	0.059	0.832
	1064	0.353	1.941				1064	0.089	1.177
	1065	6.561	10.323				1065	0.595	2.64
	1066	0.353	1.999				1066	0.416	2.153
	1067	3.737	7.797				1067	1.248	3.96
	1068	70.023	47.065				1068	0.357	2.153
	1069	2.089	5.413				1069	2.646	5.928
	1070	0.853	3.212				1070	0.386	2.153
	1071	0.177	1.313				1071	0.327	1.909
	1072	0.147	1.313				1072	0.059	0.731
	1073	32.099	29.69				1073	0.03	0.488
	1074	0.059	0.728				1074	53.061	37.563
	1075	0.088	0.97				1075	0.743	3.229
	1076	2.707	5.898				1076	0.059	0.832
	1077	0.059	0.728				1077	4.578	10.906
	1078	0.677	2.869				1078	0.743	3.027
	1079	0.235	1.698				1079	2.854	6.071
	1080	0.794	3.07				1080	0.238	1.564
	1081	0.235	1.556				1081	69.826	46.88
	1082	0.294	1.899				1082	0.119	0.975
	1083	0.647	2.727				1083	1.219	3.859
	1084	1.295	3.94				1084	0.535	2.497
	1085	53.753	30.82				1085	0.178	1.32
	1086	0.441	2.384				1086	1.486	4.406
	1087	0.53	2.627				1087	0.03	0.488
	1088	1.618	4.526				1088	0.059	0.731
	1089	1.971	5.011				1089	0.386	2.153
	1090	0.5	2.426				1090	0.803	3.128
	1091	1.736	4.626				1091	0.654	2.884
	1092	0.059	0.728				1092	4.34	7.635
	1093	0.912	3.455				1093	15.725	16.549
	1094	0.471	2.284				1094	0.565	2.64
	1095	2.913	6.04				1095	2.973	6.071
	1096	0.412	2.142				1096	2.378	5.625
	1097	4.06	7.412				1097	1.843	4.894
	1098	0.294	1.899				1098	0.03	0.488
	1099	70.582	42.179				1099	2.438	5.584
	1100	0.118	0.97				1100	1.278	4.103
	1101	8.973	17.794				1101	0.03	0.488
	1102	0.471	2.384				1102	0.297	1.909
	1103	0.118	0.97				1103	0.357	2.052
	1104	1.206	3.94				1104	86.027	47.897
	1105	0.412	2.142				1105	8.412	11.613
	1106	18.8	18.806				1106	0.565	2.598
	1107	4.119	7.554				1107	1.694	4.549
	1108	15.829	14.766				1108	0.03	0.488
	1109	0.471	2.828				1109	0.03	0.488
	1110	0.118	0.97				1110	0.386	2.052
	1111	4.296	7.838				1111	2.408	5.625
	1112	0.559	2.627				1112	0.059	0.832
	1113	1.854	5.998				1113	0.386	2.153
	1114	3.207	6.525				1114	1.13	3.717
	1115	0.088	0.97				1115	1.13	3.818
	1116	6.796	11.009				1116	1.219	3.818
	1117	0.029	0.485				1117	0.119	1.219
	1118	0.53	2.485				1118	12.158	12.832
	1119	4.884	8.182				1119	45.005	28.388
	1120	1.265	4.183				1120	1.873	4.953
	1121	0.5	2.384				1121	0.238	1.808
	1122	0.147	1.313				1122	0.505	2.497
	1123	0.235	1.556				1123	0.089	0.975
	1124	0.265	1.656				1124	0.684	2.884
	1125	0.177	1.455				1125	0.238	1.707
	1126	0.382	2.041				1126	0.535	2.64
	1127	0.5	2.485				1127	39.179	24.933
	1128	1.059	3.555				1128	1.635	4.65
	1129	0.265	1.656				1129	0.119	0.975
	1130	0.059	0.728				1130	0.208	1.564
	1131	0.118	0.97				1131	57.757	35.755
	1132	0.147	1.455				1132	2.319	5.441
	1133	1.765	5.111				1133	0.535	2.741
	1134	0.118	1.313				1134	1.011	3.859
	1135	0.559	2.627				1135	0.03	0.488
	1136	0.412	2.142				1136	0.03	0.488
	1137	4.707	10.808				1137	0.03	0.488
	1138	1	3.597				1138	0.119	0.975
	1139	0.088	0.97				1139	0.059	0.731
	1140	0.324	1.899				1140	0.149	1.32
	1141	0.412	2.284				1141	1.07	3.818
	1142	0.736	2.97				1142	0.03	0.488
	1143	1.03	3.697				1143	71.015	50.993
	1144	0.412	2.142				1144	0.981	3.574
	1145	0.206	1.455				1145	5.915	9.098
	1146	11.563	21.96				1146	0.059	0.731
	1147	0.088	0.97				1147	0.03	0.488
	1148	3.148	6.626				1148	1.902	4.894
	1149	2.471	5.797				1149	0.059	0.731
	1150	0.765	3.212				1150	0.089	0.975
	1151	0.677	2.869				1151	68.667	53.435
	1152	0.324	1.899				1152	0.386	2.052
	1153	2.001	7.253				1153	2.081	5.239
	1154	0.441	2.242				1154	0.03	0.488
	1155	0.441	2.284				1155	1.724	4.793
	1156	0.059	0.728				1156	18.46	18.98
	1157	0.294	1.799				1157	14.595	16.036
	1158	3.913	7.655				1158	6.54	9.502
	1159	0.794	3.756				1159	2.229	5.483
	1160	0.382	2.142				1160	0.03	0.488
	1161	0.029	0.485				1161	3.389	6.66
	1162	1.089	3.798				1162	0.059	0.731
	1163	0.559	2.627				1163	0.149	1.32
	1164	0.029	0.485				1164	0.059	0.731
	1165	0.941	3.455				1165	6.005	8.973
	1166	0.912	3.354				1166	0.803	3.086
	1167	66.374	45.367				1167	12.574	20.923
	1168	0.294	1.899				1168	0.565	2.539
	1169	0.412	2.142				1169	0.089	0.975
	1170	0.382	2.485				1170	0.922	3.372
	1171	1.471	4.484				1171	8.264	17.189
	1172	93.207	48.32				1172	0.149	1.32
	1173	1.677	4.727				1173	0.416	2.438
	1174	1.706	4.668				1174	1.13	3.877
	1175	0.294	1.899				1175	0.03	0.488
	1176	13.504	14.925				1176	0.476	2.741
	1177	0.029	0.485				1177	0.119	1.421
	1178	0.412	2.284				1178	0.059	0.731
	1179	1.383	4.283
	1180	10.827	16.865
	1181	2.295	5.354
	1182	0.118	0.97
	1183	0.118	1.213
	1184	0.324	2.041
	1185	0.736	3.112
	1186	2.177	5.212
	1187	0.235	1.556
	1188	0.265	1.656
	1189	0.324	2.041
	1190	2.001	5.212
	1191	8.061	13.234
	1192	0.294	1.799
	1193	0.412	2.142
	1194	0.059	0.728
	1195	0.324	1.899
	1196	3.383	6.626
	1197	1.471	4.283
	1198	0.677	2.869
	1199	1.324	4.041
	1200	6.326	9.11
	1201	1.471	4.384
	1202	9.768	13.996
	1203	1.265	4.425
	1204	1.324	5.295
	1205	0.177	1.556
	1206	0.147	1.213
	1207	0.412	2.142
	1208	0.588	2.727
	1209	0.235	1.799
	1210	44.809	25.449
	1211	0.294	1.799
	1212	0.647	3.011
	1213	7.149	11.21
	1214	1.442	5.111
	1215	0.883	3.313
	1216	0.588	2.869
	1217	1.03	3.697
	1218	0.177	1.455
	1219	0.353	1.999
	1220	0.412	2.727
	1221	2.295	5.596
	1222	0.265	1.656
	1223	0.765	3.112
	1224	28.539	24.496
	1225	0.677	2.869
	1226	11.121	12.524
	1227	0.706	2.97
	1228	0.618	2.727
	1229	0.471	2.284
	1230	0.029	0.485
	1231	0.412	2.384
	1232	0.118	0.97
	1233	8.267	10.767
	1234	2.442	5.697
	1235	0.559	2.627
	1236	1.089	3.597
	1237	1.089	3.697
	1238	1.589	4.626
	1239	0.059	0.828
	1240	1.677	4.526
	1241	0.265	1.656
	1242	11.592	16.179
	1243	1.059	3.656
	1244	0.441	2.284
	1245	0.059	0.828
	1246	1.795	4.81
	1247	78.29	42.398
	1248	0.206	1.556
	1249	0.029	0.485
	1250	1.177	4.869
	1251	15.152	14.665
	1252	0.177	1.455
	1253	0.883	3.313
	1254	18.624	16.564
	1255	0.382	2.142
	1256	1.618	4.425
	1257	0.118	0.97
	1258	0.412	2.142
	1259	0.794	3.112
	1260	0.588	2.727
	1261	0.912	3.313
	1262	0.294	1.799
	1263	0.588	2.727
	1264	0.588	2.727
	1265	0.265	1.799
	1266	0.765	3.212
	1267	139.427	46.563
	1268	0.265	1.656
	1269	0.265	1.656
	1270	1	3.455
	1271	1.089	3.697
	1272	0.147	1.313
	1273	0.029	0.485
	1274	1.236	4.041
	1275	0.118	0.97
	1276	0.265	1.656
	1277	0.294	2.041
	1278	29.274	37.252
	1279	0.206	1.556
	1280	7.855	12.423
	1281	15.387	17.191
	1282	0.294	1.941
	1283	0.206	1.455
	1284	0.206	1.455
	1285	0.088	0.97
	1286	0.029	0.485
	1287	3.413	6.525
	1288	2.56	6.383
	1289	1.765	4.626
	1290	0.412	2.142
	1291	0.265	1.799
	1292	42.543	28.703
	1293	0.559	2.769
	1294	0.059	0.728
	1295	10.062	22.68
	1296	0.765	3.212
	1297	3.119	6.425
	1298	1.677	6.182
	1299	0.206	1.556
	1300	0.794	3.455
	1301	81.703	48.06
	1302	4.472	7.554
	1303	0.853	3.212
	1304	0.059	0.728
	1305	0.177	1.556
	1306	0.118	0.97
	1307	163.553	58.685
	1308	1.265	3.898
	1309	0.5	2.384
	1310	0.441	2.284
	1311	0.059	0.828
	1312	0.471	2.384
	1313	4.384	7.554
	1314	1.147	4.141
	1315	0.206	1.556
	1316	0.471	2.426
	1317	0.677	2.869
	1318	3.972	7.998
	1319	1.383	4.283
	1320	1.589	4.626
	1321	0.647	2.869
	1322	1.265	4.283
	1323	0.206	1.455
	1324	0.118	1.213
	1325	0.471	2.384
	1326	1.059	3.555
	1327	632.969	159.632
	1328	0.059	0.728
	1329	0.647	2.869
	1330	1.736	4.727
	1331	0.206	1.656
	1332	1.118	3.656
	1333	0.588	2.627
	1334	0.324	1.899
	1335	1.177	3.94
	1336	0.206	1.556
	1337	9.356	14.021
	1338	0.118	1.213
	1339	4.325	9.252
	1340	0.5	2.384
	1341	0.059	0.828
	1342	3.236	6.383
	1343	0.147	1.313
	1344	0.294	1.799
	1345	3.295	6.809
	1346	3.854	7.211
	1347	2.177	5.413
	1348	3.795	7.17
	1349	2.442	5.555
	1350	1.324	4.141
	1351	0.206	1.556
	1352	1.854	5.111
	1353	0.765	3.07
	1354	0.029	0.485
	1355	0.559	2.627
	1356	0.824	3.271
	1357	0.471	2.485
	1358	0.294	1.899
	1359	0.5	2.727
	1360	0.177	1.313
	1361	4.825	8.282
	1362	0.206	1.455
	1363	0.118	1.313
	1364	0.088	1.171
	1365	0.029	0.485
	1366	1.206	3.798
	1367	0.706	3.212
	1368	0.059	0.728
	1369	1.383	4.526
	1370	5.502	8.625
	1371	0.177	1.455
	1372	0.029	0.485
	1373	2.56	5.655
	1374	0.088	0.97
	1375	0.559	2.585
	1376	0.265	1.656
	1377	0.265	1.656
	1378	2.618	5.898
	1379	0.088	0.97
	1380	0.177	1.455
	1381	2.177	5.596
	1382	1.265	4.141
	1383	0.029	0.485
	1384	0.441	2.526
	1385	4.148	7.454
	1386	0.118	0.97
	1387	1.442	4.141
	1388	0.059	0.828
	1389	0.029	0.485
	1390	1.206	3.94
	1391	1.854	5.212
	1392	0.088	0.97
	1393	1.118	3.798
	1394	2.089	5.354
	1395	3.295	6.626
	1396	0.088	0.97
	1397	0.618	2.828
	1398	0.088	0.97
	1399	0.736	3.07
	1400	2.354	5.881
	1401	394.922	123.627
	1402	0.294	1.899
	1403	1.03	3.555
	1404	6.885	9.98
	1405	0.265	1.698
	1406	0.088	0.97
	1407	23.714	18.564
	1408	0.412	2.142
	1409	0.853	3.212
	1410	4.796	10.465
	1411	1.5	4.626
	1412	4.207	7.738
	1413	2.324	5.596
	1414	0.471	2.384
	1415	11.062	18.546
	1416	0.029	0.485
	1417	0.177	1.656
	1418	0.412	2.142
	1419	0.971	3.455
	1420	3.177	6.383
	1421	0.206	1.556
	1422	0.941	3.313
	1423	0.559	2.627
	1424	2.618	6.082
	1425	0.618	2.727
	1426	7.885	10.424
	1427	0.677	2.869
	1428	2.118	5.253
	1429	1.412	5.354
	1430	0.824	3.84
	1431	0.471	2.343
	1432	1.618	4.869
	1433	5.031	8.182
	1434	1.03	3.697
	1435	2.471	5.596
	1436	0.588	2.727
	1437	37.306	23.325
	1438	0.235	1.799
	1439	0.441	2.284
	1440	0.206	1.556
	1441	0.677	3.112
	1442	0.059	0.828
	1443	0.353	2.041
	1444	0.059	0.828
	1445	0.265	1.899
	1446	0.088	0.97
	1447	0.265	1.656
	1448	0.088	0.97
	1449	0.412	2.142
	1450	17.623	16.481
	1451	60.137	34.843
	1452	0.412	2.142
	1453	0.324	1.941
	1454	3.325	8.868
	1455	0.412	2.142
	1456	1.059	3.555
	1457	2.324	5.697
	1458	0.265	1.656
	1459	4.178	7.353
	1460	0.618	2.627
	1461	0.471	2.526
	1462	0.382	2.284
	1463	0.206	1.556
	1464	0.412	2.284
	1465	0.941	3.555
	1466	3.266	6.484
	1467	0.794	3.07
	1468	0.353	2.142
	1469	2.059	5.312
	1470	35.276	23.65
	1471	0.235	1.799
	1472	6.914	10.867
	1473	8.973	12.364
	1474	3.177	6.525
	1475	3.06	6.525
	1476	0.441	2.284
	1477	0.471	2.526
	1478	1.03	4.041
	1479	0.647	2.727
	1480	0.441	2.242
	1481	171.085	89.706
	1482	0.912	3.354
	1483	1.559	4.827
	1484	0.147	1.213
	1485	3.913	7.696
	1486	0.588	2.727
	1487	0.294	1.941
	1488	0.618	2.727
	1489	0.559	2.526
	1490	0.971	3.413
	1491	0.736	2.97
	1492	0.441	2.242
	1493	1	3.514
	1494	502.957	180.399
	1495	0.118	0.97
	1496	0.029	0.485
	1497	0.118	0.97
	1498	0.324	1.899
	1499	2.236	5.981
	1500	0.059	0.728
	1501	6.767	11.068
	1502	8.267	14.707
	1503	0.118	0.97
	1504	3.383	8.424
	1505	0.029	0.485
	1506	1.971	5.253
	1507	0.441	2.284
	1508	10.092	22.604
	1509	0.471	2.343
	1510	1.03	3.555
	1511	0.059	0.728
	1512	0.059	0.828
	1513	0.235	1.556
	1514	74.142	35.738
	1515	0.53	2.526
	1516	0.441	2.242
	1517	3.472	7.454
	1518	0.265	1.698
	1519	0.235	1.556
	1520	14.593	20.095
	1521	0.324	2.041
	1522	1.471	4.526
	1523	2.265	5.354
	1524	0.088	0.97
	1525	136.927	54.252
	1526	2.059	5.111
	1527	0.559	2.627
	1528	3.854	12.104
	1529	18.329	16.807
	1530	8.444	15.535
	1531	0.088	1.313
	1532	0.294	2.142
	1533	0.029	0.485
	1534	0.294	1.799
	1535	2.148	5.212
	1536	1.03	3.656
	1537	6.943	9.696
	1538	0.029	0.485
	1539	0.294	1.941
	1540	0.029	0.485
	1541	6.355	9.595
	1542	0.853	3.212
	1543	0.029	0.485
	1544	1.618	4.969
	1545	3.707	6.969
	1546	5.002	8.525
	1547	0.177	1.313
	1548	0.382	2.142
	1549	0.853	3.313
	1550	4.06	7.312
	1551	0.029	0.485
	1552	0.5	2.627
	1553	0.265	1.656
	1554	0.883	3.313
	1555	0.118	0.97
	1556	0.53	2.485
	1557	1.795	5.312
	1558	5.208	11.536
	1559	3.707	7.981
	1560	6.443	12.038
	1561	1.265	4.183
	1562	1.059	3.697
	1563	2.059	5.697
	1564	0.118	0.97
	1565	0.265	1.799
	1566	5.149	8.282
	1567	3.56	6.868
	1568	0.412	2.284
	1569	0.235	1.556
	1570	2.383	5.756
	1571	1.089	3.597
	1572	0.912	4.141
	1573	4.501	7.696
	1574	0.912	3.555
	1575	1.706	5.312
	1576	0.029	0.485
	1577	0.029	0.485
	1578	0.353	2.142
	1579	1.265	4.041
	1580	6.796	11.352
	1581	7.65	10.139
	1582	395.716	141.956
	1583	0.794	3.212
	1584	0.059	0.728
	1585	5.031	8.424
	1586	0.177	1.313
	1587	1.971	5.212
	1588	0.971	3.84
	1589	4.354	7.838
	1590	1.295	4.082
	1591	1.648	4.626
	1592	0.382	2.142
	1593	4.825	7.939
	1594	5.619	8.726
	1595	0.324	1.941
	1596	0.441	2.284
	1597	0.441	2.284
	1598	1.471	4.869
	1599	0.941	3.354
	1600	0.265	1.656
	1601	1.824	4.869
	1602	0.177	1.313
	1603	5.619	10.85
	1604	2.589	6.425
	1605	4.501	7.88
	1606	0.706	3.07
	1607	0.029	0.485
	1608	0.441	2.284
	1609	1.03	3.756
	1610	54.93	32.667
	1611	0.265	1.698
	1612	0.736	2.97
	1613	0.059	0.828
	1614	5.855	10.323
	1615	0.265	1.698
	1616	0.471	2.384
	1617	4.296	7.696
	1618	5.531	8.583
	1619	0.118	1.213
	1620	0.559	2.585
	1621	95.413	40.474
	1622	9.209	11.695
	1623	0.382	2.041
	1624	0.059	0.728
	1625	0.059	0.728
	1626	1.089	3.597
	1627	0.412	2.142
	1628	0.206	1.556
	1629	2.236	5.454
	1630	0.647	2.769
	1631	0.382	2.384
	1632	0.853	4.041
	1633	0.059	0.728
	1634	2.972	6.182
	1635	0.059	0.728
	1636	0.382	2.041
	1637	0.177	1.313
	1638	0.853	3.112
	1639	0.177	1.556
	1640	0.824	3.212
	1641	0.029	0.485
	1642	0.883	4.567
	1643	0.029	0.485
	1644	149.195	58.768
	1645	2.442	5.596
	1646	0.353	1.999
	1647	0.412	2.284
	1648	0.118	1.313
	1649	10.033	13.293
	1650	0.118	1.313
	1651	5.59	9.613
	1652	0.206	1.556
	1653	45.25	25.733
	1654	140.545	57.815
	1655	8.444	10.625
	1656	3.531	7.454
	1657	1.442	4.241
	1658	0.059	0.728
	1659	0.471	2.384
	1660	0.294	1.799
	1661	1.618	4.484
	1662	3.089	6.383
	1663	0.088	0.97
	1664	0.941	3.455
	1665	0.941	3.94
	1666	0.029	0.485
	1667	0.059	0.828
	1668	0.265	1.656
	1669	0.265	1.799
	1670	0.206	1.656
	1671	9.562	11.494
	1672	2.766	6.04
	1673	0.088	0.97
	1674	1.089	3.798
	1675	0.412	2.142
	1676	0.147	1.455
	1677	2.03	5.655
	1678	2.707	6.182
	1679	0.265	1.656
	1680	0.147	1.313
	1681	0.677	2.828
	1682	0.206	1.556
	1683	0.206	1.556
	1684	1.883	5.94
	1685	0.353	2.142
	1686	14.063	16.062
	1687	79.496	50.403
	1688	14.299	15.31
	1689	0.177	1.313
	1690	1.912	4.969
	1691	6.178	9.453
	1692	0.559	2.627
	1693	0.324	2.041
	1694	1.5	4.626
	1695	49.487	50.143
	1696	2.207	5.253
	1697	1.5	4.283
	1698	3.942	7.211
	1699	0.294	1.799
	1700	1.5	4.484
	1701	0.588	2.627
	1702	0.265	1.656
	1703	4.413	7.696
	1704	4.384	7.554
	1705	0.559	2.526
	1706	0.5	2.526
	1707	3.089	6.383
	1708	16.77	15.008
	1709	0.412	2.142
	1710	0.677	2.869
	1711	0.029	0.485
	1712	0.471	2.526
	1713	2.766	5.998
	1714	0.382	2.284
	1715	1.206	5.555
	1716	0.118	0.97
	1717	3.207	7.981
	1718	1.059	3.697
	1719	1.677	4.869
	1720	0.029	0.485
	1721	9.003	11.796
	1722	0.647	2.869
	1723	4.943	9.27
	1724	0.324	2.041
	1725	4.678	8.081
	1726	10.945	13.068
	1727	2.236	5.354
	1728	52.517	43.351
	1729	0.736	2.97
	1730	2.972	6.283
	1731	5.884	8.726
	1732	6.296	9.595
	1733	0.147	1.213
	1734	2.177	5.253
	1735	0.029	0.485
	1736	2.677	5.898
	1737	17.741	15.978
	1738	13.74	22.195
	1739	0.029	0.485
	1740	0.971	3.455
	1741	2.059	5.111
	1742	3.619	6.868
	1743	0.677	2.911
	1744	0.029	0.485
	1745	0.059	0.728
	1746	384.566	112.795
	1747	0.294	1.899
	1748	26.303	19.35
	1749	135.014	47.426
	1750	0.294	1.899
	1751	2.736	5.94
	1752	0.912	3.555
	1753	9.15	11.938
	1754	0.588	2.627
	1755	0.588	2.727
	1756	1.471	4.283
	1757	0.559	2.769
	1758	0.441	2.284
	1759	0.177	1.313
	1760	0.5	2.526
	1761	6.267	9.11
	1762	1.265	3.898
	1763	2.265	5.596
	1764	0.265	1.656
	1765	0.029	0.485
	1766	0.588	2.627
	1767	0.177	1.455
	1768	1.353	4.141
	1769	4.06	7.454
	1770	0.559	2.627
	1771	5.943	8.927
	1772	2.118	5.153
	1773	0.883	3.798
	1774	1.383	4.141
	1775	1.324	4.183
	1776	0.294	1.941
	1777	0.147	1.313
	1778	1.206	3.798
	1779	0.618	2.727
	1780	0.412	2.242
	1781	0.382	2.183
	1782	10.239	11.837
	1783	394.333	238.72
	1784	14.328	14.623
	1785	1.706	5.496
	1786	0.235	1.556
	1787	0.736	2.97
	1788	0.118	0.97
	1789	1.089	3.697
	1790	113.89	60.625
	1791	10.092	11.796
	1792	0.235	1.799
	1793	1.5	4.342
	1794	0.029	0.485
	1795	0.059	0.828
	1796	0.471	2.284
	1797	0.618	2.627
	1798	0.029	0.485
	1799	0.53	2.627
	1800	0.029	0.485
	1801	0.029	0.485
	1802	1.706	4.768
	1803	4.266	7.454
	1804	1.236	4.526
	1805	0.324	1.941
	1806	5.884	9.353
	1807	0.265	1.799
	1808	1.295	4.526
	1809	0.53	2.526
	1810	0.471	2.485
	1811	3.295	7.01
	1812	0.029	0.485
	1813	2.089	5.354
	1814	0.853	3.313
	1815	0.029	0.485
	1816	0.912	3.497
	1817	1.442	4.626
	1818	0.029	0.485
	1819	2.53	5.655
	1820	0.441	2.242
	1821	1.089	3.697
	1822	8.738	10.95
	1823	7.65	11.636
	1824	1.942	4.969
	1825	0.912	3.313
	1826	38.601	23.727
	1827	0.118	1.313
	1828	87.881	42.457
	1829	2.059	5.253
	1830	0.059	0.828
	1831	29.245	24.545
	1832	84.969	48.881
	1833	4.237	7.738
	1834	0.059	0.728
	1835	1.471	4.325
	1836	2.354	6.082
	1837	0.147	1.313
	1838	0.559	2.526
	1839	0.294	2.343
	1840	1.265	4.141
	1841	1.589	4.526
	1842	3.972	9.637
	1843	0.324	1.899
	1844	0.265	1.799
	1845	0.118	1.313
	1846	1.206	3.94
	1847	4.09	7.554
	1848	0.235	1.556
	1849	2.265	5.697
	1850	0.029	0.485
	1851	4.56	7.738
	1852	0.971	3.455
	1853	0.471	2.384
	1854	0.588	2.727
	1855	0.294	1.899
	1856	1.265	4.082
	1857	4.855	8.14
	1858	14.328	14.405
	1859	0.618	2.627
	1860	0.265	1.656
	1861	1.03	4.668
	1862	0.706	2.869
	1863	0.235	1.556
	1864	0.059	0.728
	1865	1.971	4.969
	1866	1.971	4.969
	1867	9.974	15.393
	1868	0.118	0.97
	1869	5.561	8.667
	1870	0.853	3.153
	1871	0.147	1.313
	1872	0.265	1.799
	1873	3.413	6.726
	1874	0.147	1.213
	1875	0.059	0.828
	1876	0.412	2.142
	1877	1.706	4.626
	1878	2.942	6.14
	1879	0.177	1.313
	1880	1.824	4.869
	1881	0.853	3.313
	1882	3.148	6.768
	1883	0.883	3.212
	1884	0.235	1.556
	1885	11.386	13.695
	1886	0.412	2.142
	1887	0.883	3.313
	1888	2.148	5.312
	1889	2.207	5.354
	1890	2.824	6.425
	1891	2.913	6.182
	1892	0.324	1.899
	1893	0.736	3.112
	1894	16.505	16.422
	1895	2.207	5.94
	1896	14.416	15.008
	1897	2.883	6.14
	1898	0.265	1.656
	1899	0.029	0.485
	1900	0.206	1.556
	1901	0.441	2.242
	1902	0.294	1.799
	1903	0.088	1.171
	1904	8.267	18.806
	1905	3.354	6.868
	1906	0.088	1.071
	1907	8.12	12.222
	1908	3.972	7.211
	1909	1.471	4.384
	1910	0.382	2.041
	1911	0.5	2.384
	1912	0.265	1.799
	1913	0.618	2.97
	1914	0.324	2.041
	1915	0.088	0.97
	1916	1.442	4.183
	1917	0.559	2.627
	1918	0.765	2.97
	1919	0.206	1.556
	1920	0.265	1.698
	1921	1.236	4.041
	1922	0.177	1.313
	1923	98.856	39.369
	1924	0.324	1.899
	1925	0.794	3.112
	1926	3.383	8.365
	1927	0.059	0.728
	1928	110.506	47.759
	1929	0.912	3.697
	1930	0.206	1.656
	1931	3.501	6.969
	1932	0.53	2.485
	1933	13.887	15.528
	1934	19.506	16.38
	1935	1.177	3.898
	1936	1.442	4.283
	1937	2.148	5.354
	1938	0.706	3.112
	1939	0.235	1.556
	1940	0.912	3.313
	1941	6.149	9.11
	1942	41.955	24.562
	1943	0.265	1.656
	1944	0.294	1.799
	1945	0.794	3.313
	1946	0.618	2.727
	1947	0.853	3.455
	1948	1.295	3.999
	1949	0.441	2.242
	1950	1.383	4.141
	1951	6.502	10.625
	1952	0.794	3.212
	1953	0.265	1.799
	1954	0.824	3.212
	1955	0.559	2.526
	1956	1.324	4.183
	1957	0.029	0.485
	1958	20.095	20.279
	1959	0.177	1.455
	1960	0.265	1.799
	1961	80.732	37.872
	1962	0.736	3.112
	1963	192.18	54.561
	1964	0.471	2.384
	1965	1.618	4.484
	1966	0.588	2.727
	1967	0.265	1.799
	1968	0.029	0.485
	1969	0.088	0.97
	1970	2.177	5.212
	1971	0.853	3.555
	1972	0.588	3.739
	1973	0.471	2.343
	1974	0.029	0.485
	1975	34.364	25.089
	1976	7.002	10.666
	1977	9.974	20.102
	1978	1.147	3.798
	1979	1.059	3.697
	1980	9.15	11.11
	1981	0.883	3.254
	1982	5.767	10.784
	1983	2.824	6.04
	1984	0.971	3.555
	1985	0.235	1.556
[truncated: 208 more rows]
